# Supplementary material for: In Vitro Efficacy of Bacterial Cellulose Dressings Chemisorbed with Antiseptics against Biofilm Formed by Pathogens Isolated from Chronic Wounds
Source: PubMed Central journal article supplement (PMC8069587; doi:10.3390/ijms22083996), 2021-04-13
Supplement: ijms-22-03996-s001.pdf [file ijms-22-03996-s001.pdf]

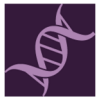

Supplementary Materials

# In Vitro Efficacy of Bacterial Cellulose Dressings Chemisorbed with Antiseptics Against Biofilm Formed by Pathogens Isolated from Chronic Wounds

Karolina Dydak <sup>1</sup>, Adam Junka <sup>1,\*</sup>, Agata Dydak <sup>2</sup>, Malwina Brożyna <sup>1</sup>, Justyna Paleczny <sup>1</sup>, Karol Fijalkowski <sup>3</sup>, Grzegorz Kubiela <sup>4</sup>, Olga Aniołek <sup>5</sup> and Marzenna Bartoszewicz <sup>1</sup>

<sup>1</sup> Department of Pharmaceutical Microbiology and Parasitology, Medical University of Wrocław, 50-556 Wrocław, Poland; karolina.dydak@umed.wroc.pl (K.D.); malwina.brozyna@student.umed.wroc.pl (M.B.); justyna.paleczny@student.umed.wroc.pl (J.P.); marzenna.bartoszewicz@umed.wroc.pl (M.B.)

<sup>2</sup> Faculty of Biological Sciences, University of Wrocław, 51-148 Wrocław, Poland; adam.junka@umed.wroc.pl

<sup>3</sup> Department of Microbiology and Biotechnology, Faculty of Biotechnology and Animal Husbandry, West Pomeranian University of Technology, Szczecin, Piastow 45, 70-311 Szczecin, Poland; kfijalkowski@zut.edu.pl

<sup>4</sup> Faculty of Health Sciences, Wrocław Medical University, 50-996 Wrocław, Poland; grzegorz.kubielas@umed.wroc.pl

<sup>5</sup> Faculty of Medicine, Lazarski University, 02-662 Warsaw, Poland; olga.aniolek@lazarski.pl

\* Correspondence: adam.junka@umed.wroc.pl; Tel.: +48-889229341

**Citation:** Dydak, K.; Junka, A.; Dydak, A.; Brożyna, M.; Paleczny, J.; Fijalkowski, K.; Kubiela, G.; Aniołek, O.; Bartoszewicz, M. In Vitro Efficacy of Bacterial Cellulose Dressings Chemisorbed with Antiseptics Against Biofilm Formed by Pathogens Isolated from Chronic Wounds. *Int. J. Mol. Sci.* **2021**, *22*, x. <https://doi.org/10.3390/xxxxx>

Academic Editors: Giovanna Batoni; Giuseppantonio Maisetta and Semih Esin

Received: 30 March 2021

Accepted: 12 April 2021

Published: 13 April 2021

**Publisher's Note:** MDPI stays neutral with regard to jurisdictional claims in published maps and institutional affiliations.

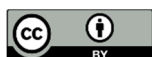

**Copyright:** © 2021 by the authors. Licensee MDPI, Basel, Switzerland. This article is an open access article distributed under the terms and conditions of the Creative Commons Attribution (CC BY) license (<http://creativecommons.org/licenses/by/4.0/>).

**Abstract:** Local administration of antiseptics is required to prevent and fight against biofilm-based infections of chronic wounds. One of the methods used for delivering antiseptics to infected wounds is the application of dressings chemisorbed with antimicrobials. Dressings made of bacterial cellulose (BC) display several features, making them suitable for such a purpose. This work aimed to compare the activity of commonly used antiseptic molecules: octenidine, polyhexanide, povidone-iodine, chlorhexidine, ethacridine lactate, and hypochlorous solutions and to evaluate their usefulness as active substances of BC dressings against 48 bacterial strains (8 species) and 6 yeast strains (1 species). A silver dressing was applied as a control material of proven antimicrobial activity. The methodology applied included the assessment of minimal inhibitory concentrations (MIC) and minimal biofilm eradication concentration (MBEC), the modified disc-diffusion method, and the modified antibiofilm dressing activity measurement (A.D.A.M.) method. While in 96-well plate-based methods (MIC and MBEC assessment), the highest antimicrobial activity was recorded for chlorhexidine, in the modified disc-diffusion method and in the modified A.D.A.M test, povidone-iodine performed the best. In an in vitro setting simulating chronic wound conditions, BC dressings chemisorbed with polyhexanide, octenidine, or povidone-iodine displayed a similar or even higher antibiofilm activity than the control dressing containing silver molecules. If translated into clinical conditions, the obtained results suggest high applicability of BC dressings chemisorbed with antiseptics to eradicate biofilm from chronic wounds.

**Keywords:** bacterial cellulose; dressing; antiseptics; chronic wounds

**Table S1. Resistance mechanisms of tested strains.** KPC – *K. pneumoniae* carbapenemase; MBL – metallo- $\beta$ -lactamase; ESBL – extended spectrum of  $\beta$ -lactamases; OXA-48 – class D carbapenemases; MRSA/MRCNS – methicillin resistant *S. aureus*/methicillin resistant coagulase negative *Staphylococci*; MLS<sub>B</sub> – macrolides, lincosamides and streptogramin B resistance, con + - constitutive MLS<sub>B</sub>, ind + - inductive MLS<sub>B</sub>, MS<sub>B</sub> - retained susceptibility to lincosamides; VRSA/VRE – vancomycin resistant *S. aureus*/vancomycin resistant *Enterococci*; HLAR – high level of aminoglycosides resistance. Tested strains: SA – *Staphylococcus aureus*, SE – *Staphylococcus epidermidis*, EF – *Enterococcus faecium*, KP – *Klebsiella pneumoniae*, EC – *Escherichia coli*, PA – *Pseudomonas aeruginosa*, ECL – *Enterobacter cloacae*, AB – *Acinetobacter baumannii*, CA – *Candida albicans*. Green – lack of resistance mechanism, red – resistance mechanism occurs, grey – this resistance mechanism is not relevant for the strain.

|           | KPC | MBL | ESBL | OXA-48 | MRSA/MRCNS | MLSB  | VRSA/VRE          | HLAR |
|-----------|-----|-----|------|--------|------------|-------|-------------------|------|
| SA 33591  |     |     |      |        | +          | -     | 0,125 $\mu$ g/ml  |      |
| SA 1      |     |     |      |        | +          | con + | 0,0625 $\mu$ g/ml |      |
| SA 2      |     |     |      |        | +          | con + | 0,5 $\mu$ g/ml    |      |
| SA 3      |     |     |      |        | +          | ind + | 0,25 $\mu$ g/ml   |      |
| SA 4      |     |     |      |        | +          | con + | 0,125 $\mu$ g/ml  |      |
| SA 5      |     |     |      |        | +          | con + | 0,25 $\mu$ g/ml   |      |
| SE 2118   |     |     |      |        | -          | -     |                   |      |
| SE 1      |     |     |      |        | -          | -     |                   |      |
| SE 2      |     |     |      |        | -          | -     |                   |      |
| SE 3      |     |     |      |        | -          | -     |                   |      |
| SE 4      |     |     |      |        | -          | MSB + |                   |      |
| SE 5      |     |     |      |        | -          | -     |                   |      |
| EF 19434  |     |     |      |        |            |       | 0,25 $\mu$ g/ml   | -    |
| EF 1      |     |     |      |        |            |       | 128 $\mu$ g/ml    | +    |
| EF 2      |     |     |      |        |            |       | 250 $\mu$ g/ml    | +    |
| EF 3      |     |     |      |        |            |       | 250 $\mu$ g/ml    | +    |
| EF 4      |     |     |      |        |            |       | 512 $\mu$ g/ml    | +    |
| EF 5      |     |     |      |        |            |       | 128 $\mu$ g/ml    | +    |
| KP 4352   | -   | -   | -    | -      |            |       |                   |      |
| KP 1      | -   | -   | +    | -      |            |       |                   |      |
| KP 2      | -   | +   | +    | +      |            |       |                   |      |
| KP 3      | +   | +   | +    | +      |            |       |                   |      |
| KP 4      | -   | -   | +    | -      |            |       |                   |      |
| KP 5      | -   | -   | +    | -      |            |       |                   |      |
| EC 25922  | -   | -   | -    | -      |            |       |                   |      |
| EC 1      | -   | -   | -    | -      |            |       |                   |      |
| EC 2      | -   | -   | -    | -      |            |       |                   |      |
| EC 3      | -   | -   | +    | -      |            |       |                   |      |
| EC 4      | -   | -   | -    | -      |            |       |                   |      |
| EC 5      | -   | -   | +    | -      |            |       |                   |      |
| PA 27853  | -   | +   | -    | -      |            |       |                   |      |
| PA 1      | -   | -   | -    | -      |            |       |                   |      |
| PA 2      | -   | +   | -    | -      |            |       |                   |      |
| PA 3      | -   | +   | -    | -      |            |       |                   |      |
| PA 4      | -   | +   | -    | -      |            |       |                   |      |
| PA 5      | -   | +   | -    | -      |            |       |                   |      |
| ECL 13047 | -   | -   | -    | -      |            |       |                   |      |
| ECL 1     | -   | -   | +    | +      |            |       |                   |      |
| ECL 2     | -   | +   | +    | -      |            |       |                   |      |
| ECL 3     | -   | -   | +    | -      |            |       |                   |      |
| ECL 4     | -   | +   | +    | -      |            |       |                   |      |
| ECL 5     | -   | +   | -    | +      |            |       |                   |      |
| AB 2740   | -   | -   | -    | -      |            |       |                   |      |
| AB 1      | -   | -   | -    | -      |            |       |                   |      |
| AB 2      | -   | -   | -    | -      |            |       |                   |      |
| AB 3      | -   | -   | -    | -      |            |       |                   |      |
| AB 4      | -   | -   | -    | -      |            |       |                   |      |
| AB 5      | -   | -   | -    | -      |            |       |                   |      |

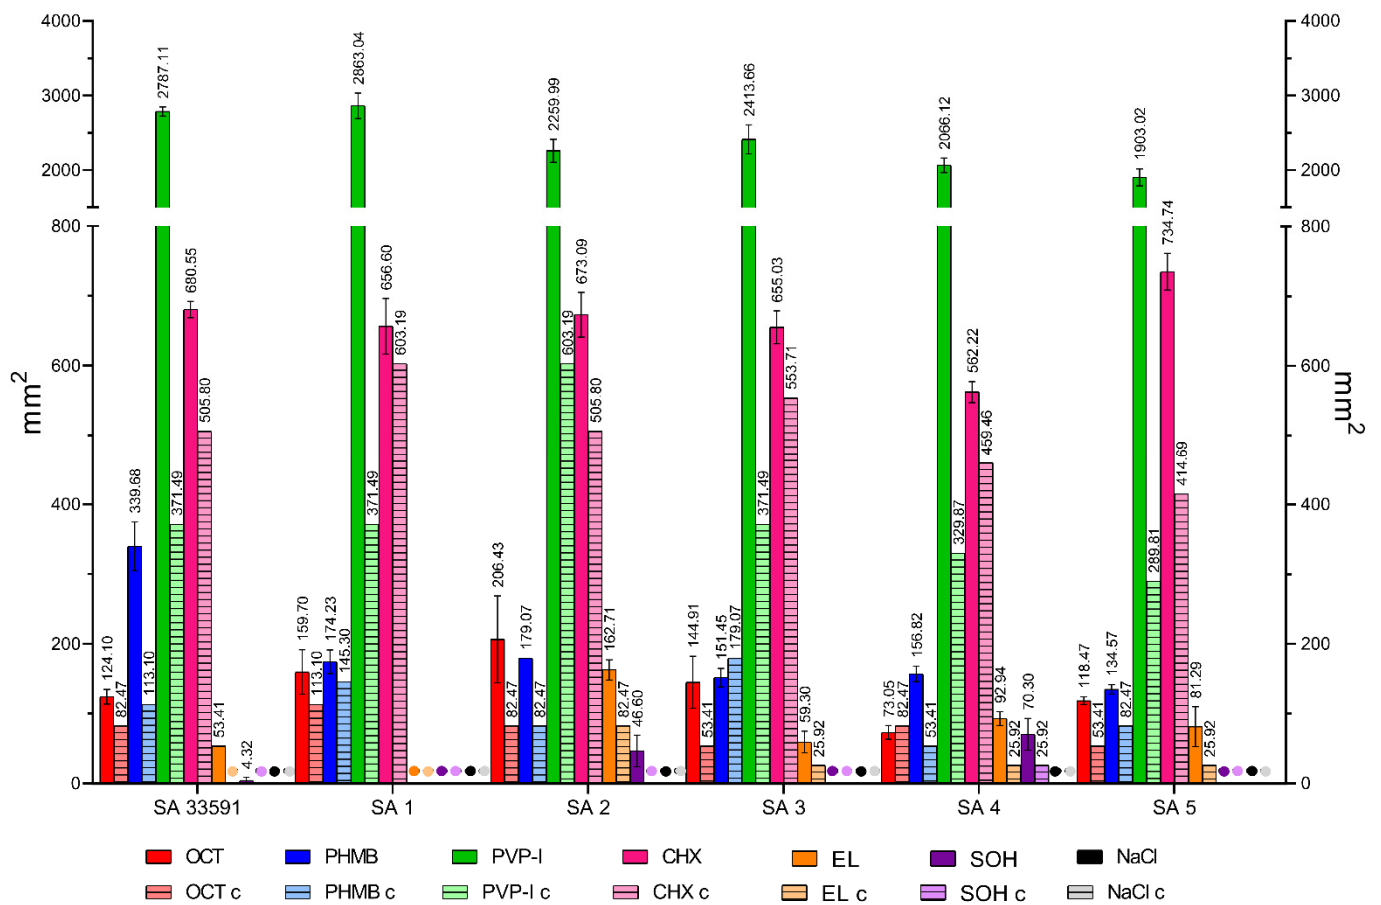

**Figure S1. Areas of growth inhibition zones for *Staphylococcus aureus* strains.** Coloured bars indicate average growth inhibition zones areas caused by bacterial cellulose (BC) dressings chemisorbed with tested compounds (OCT – octenidine dihydrochloride, PHMB – polyhexanide, PVP-I – povidone iodine, CHX – chlorhexidine, EL – ethacridine lactate, SOH – super-oxidized hypochlorites solution, NaCl – sodium chloride as a negative control); striped bars indicate areas of growth inhibition zones caused by blotting paper soaked with tested compounds (OCT c – control of OCT activity, PHMB c – control of PHMB activity, PVP-I c – control of PVP-I activity, CHX c – control of CHX activity, EL c – control of EL activity, SOH c – control of SOH activity, NaCl c – control of NaCl activity). Dots point ineffective BC/blotting paper dressings. Growth inhibition zones areas exclude BC/blotting paper dressings surface areas.

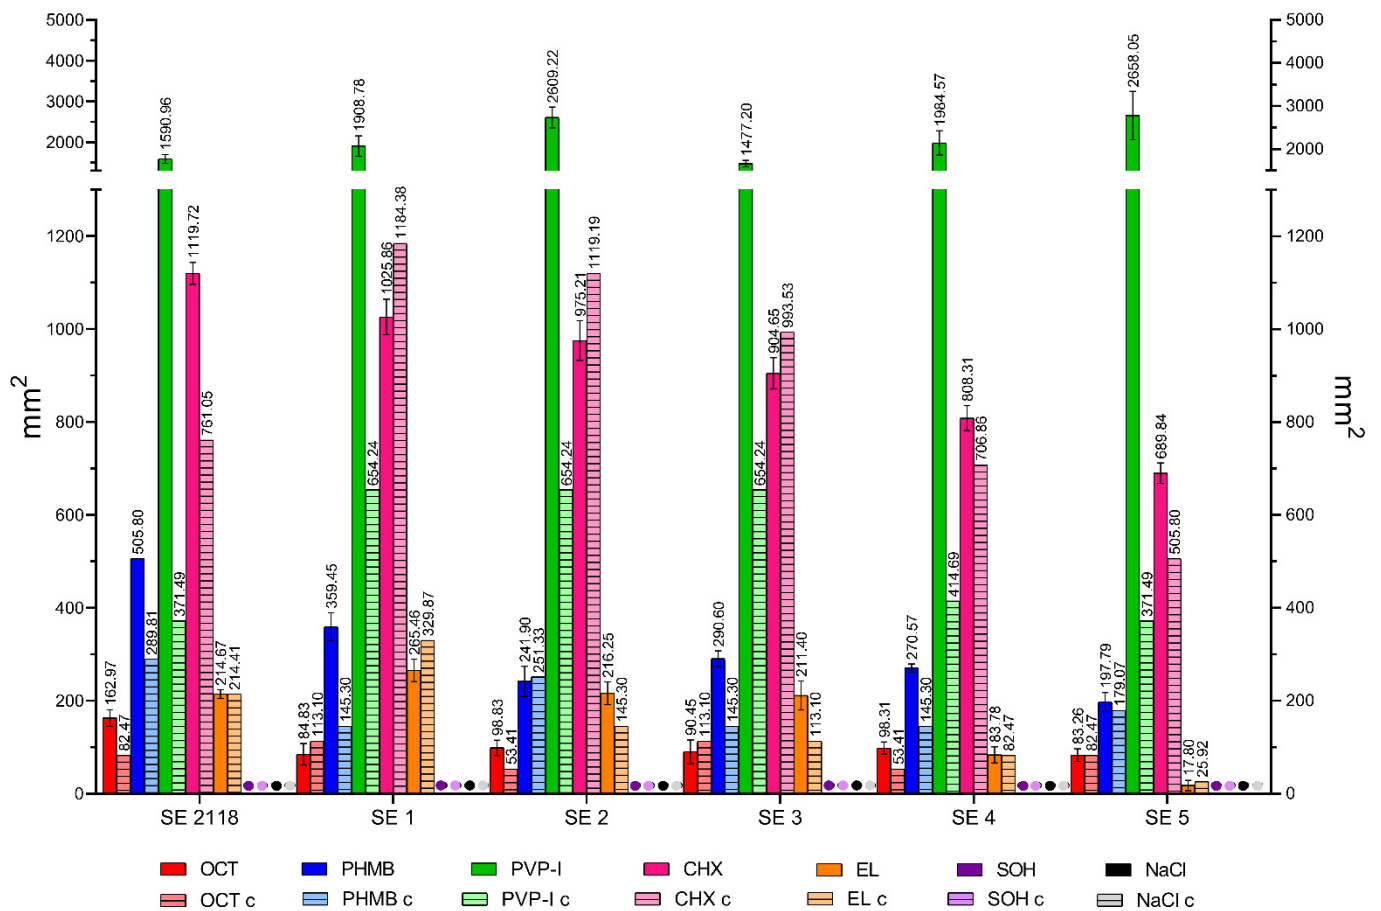

**Figure S2. Areas of growth inhibition zones for *Staphylococcus epidermidis* strains.** Coloured bars indicate average growth inhibition zones areas caused by bacterial cellulose (BC) dressings chemisorbed with tested compounds (OCT – octenidine dihydrochloride, PHMB – polyhexanide, PVP-I – povidone iodine, CHX – chlorhexidine, EL – ethacridine lactate, SOH – super-oxidized hypochlorites solution, NaCl – sodium chloride as a negative control); striped bars indicate areas of growth inhibition zones caused by blotting paper soaked with tested compounds (OCT c – control of OCT activity, PHMB c – control of PHMB activity, PVP-I c – control of PVP-I activity, CHX c – control of CHX activity, EL c – control of EL activity, SOH c – control of SOH activity, NaCl c – control of NaCl activity). Dots point ineffective BC/blotting paper dressings. Growth inhibition zones areas exclude BC/blotting paper dressings surface areas.

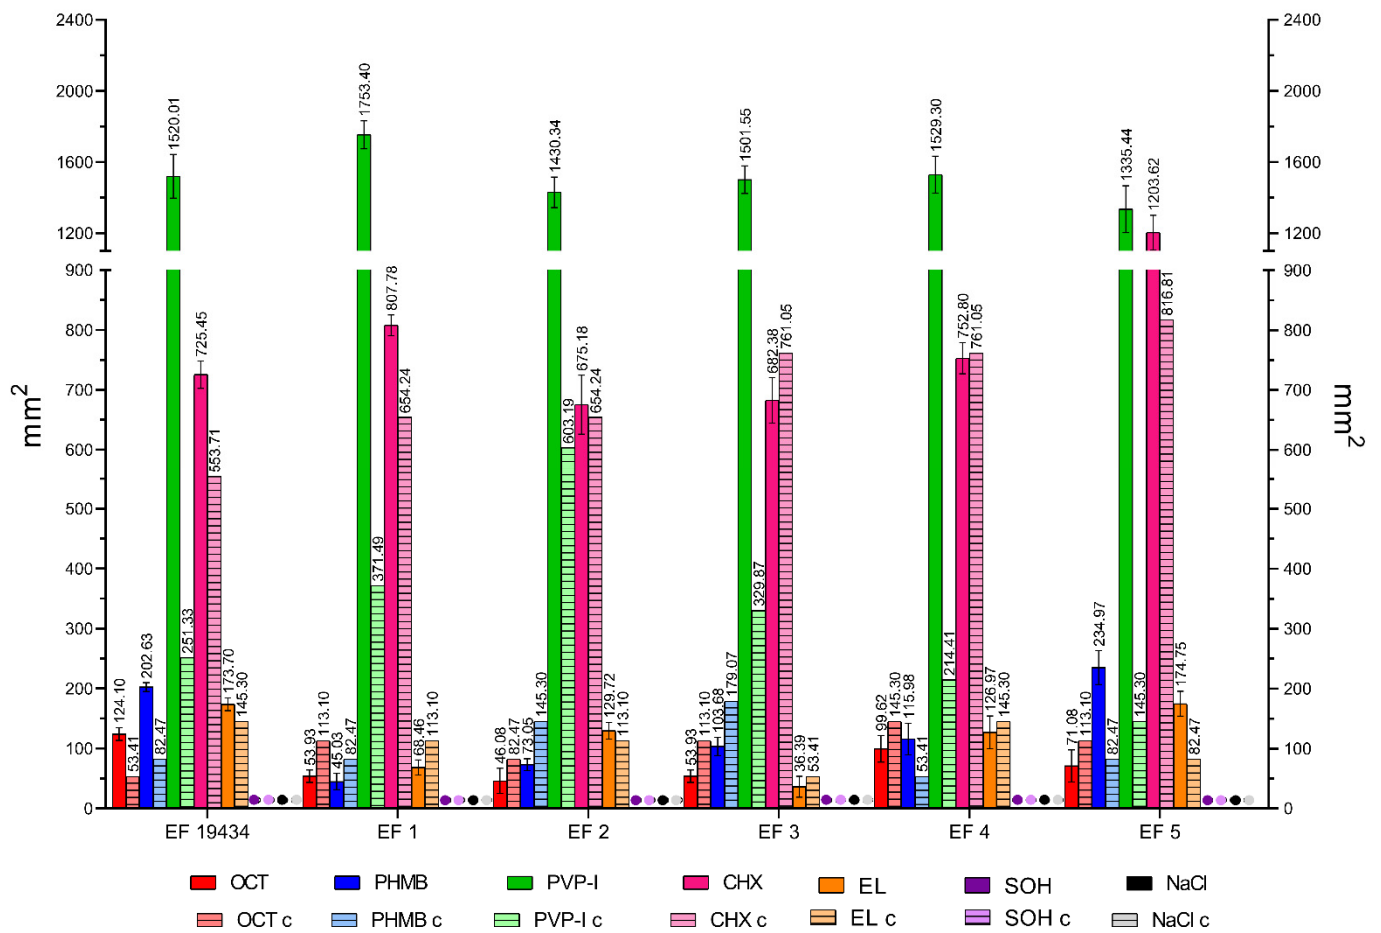

**Figure S3. Areas of growth inhibition zones for *Enterococcus faecium* strains.** Coloured bars indicate average growth inhibition zones areas caused by bacterial cellulose (BC) dressings chemisorbed with tested compounds (OCT – octenidine dihydrochloride, PHMB – polyhexanide, PVP-I – povidone iodine, CHX – chlorhexidine, EL – ethacridine lactate, SOH – super-oxidized hypochlorites solution, NaCl – sodium chloride as a negative control); striped bars indicate areas of growth inhibition zones caused by blotting paper soaked with tested compounds (OCT c – control of OCT activity, PHMB c – control of PHMB activity, PVP-I c – control of PVP-I activity, CHX c – control of CHX activity, EL c – control of EL activity, SOH c – control of SOH activity, NaCl c – control of NaCl activity). Dots point ineffective BC/blotting paper dressings. Growth inhibition zones areas exclude BC/blotting paper dressings surface areas.

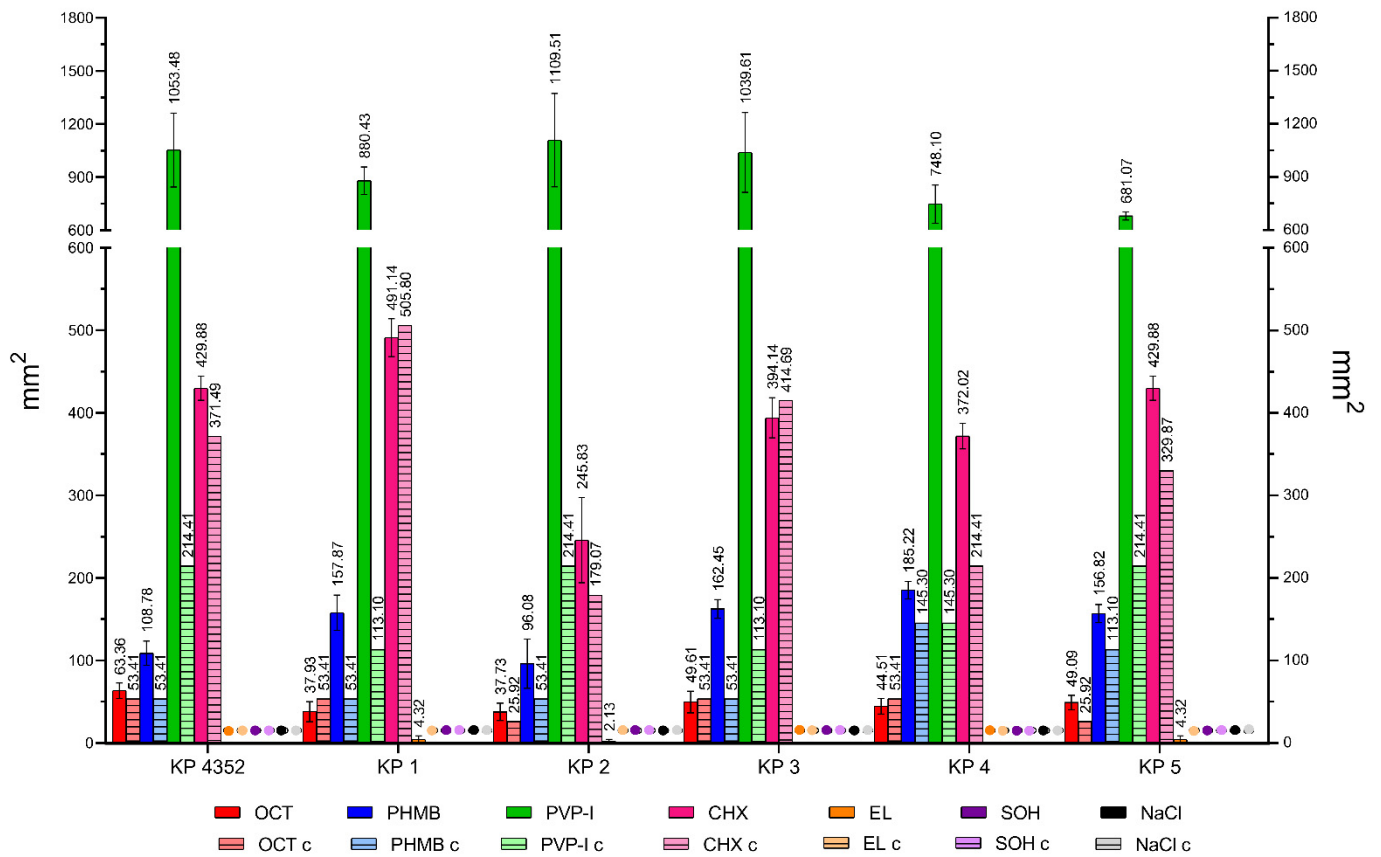

**Figure S4. Areas of growth inhibition zones for *Klebsiella pneumoniae* strains.** Coloured bars indicate average growth inhibition zones areas caused by bacterial cellulose (BC) dressings chemisorbed with tested compounds (OCT – octenidine dihydrochloride, PHMB – polyhexanide, PVP-I – povidone iodine, CHX – chlorhexidine, EL – ethacridine lactate, SOH – super-oxidized hypochlorites solution, NaCl – sodium chloride as a negative control); striped bars indicate areas of growth inhibition zones caused by blotting paper soaked with tested compounds (OCT c – control of OCT activity, PHMB c – control of PHMB activity, PVP-I c – control of PVP-I activity, CHX c – control of CHX activity, EL c – control of EL activity, SOH c – control of SOH activity, NaCl c – control of NaCl activity). Dots point ineffective BC/blotting paper dressings. Growth inhibition zones areas exclude BC/blotting paper dressings surface areas.

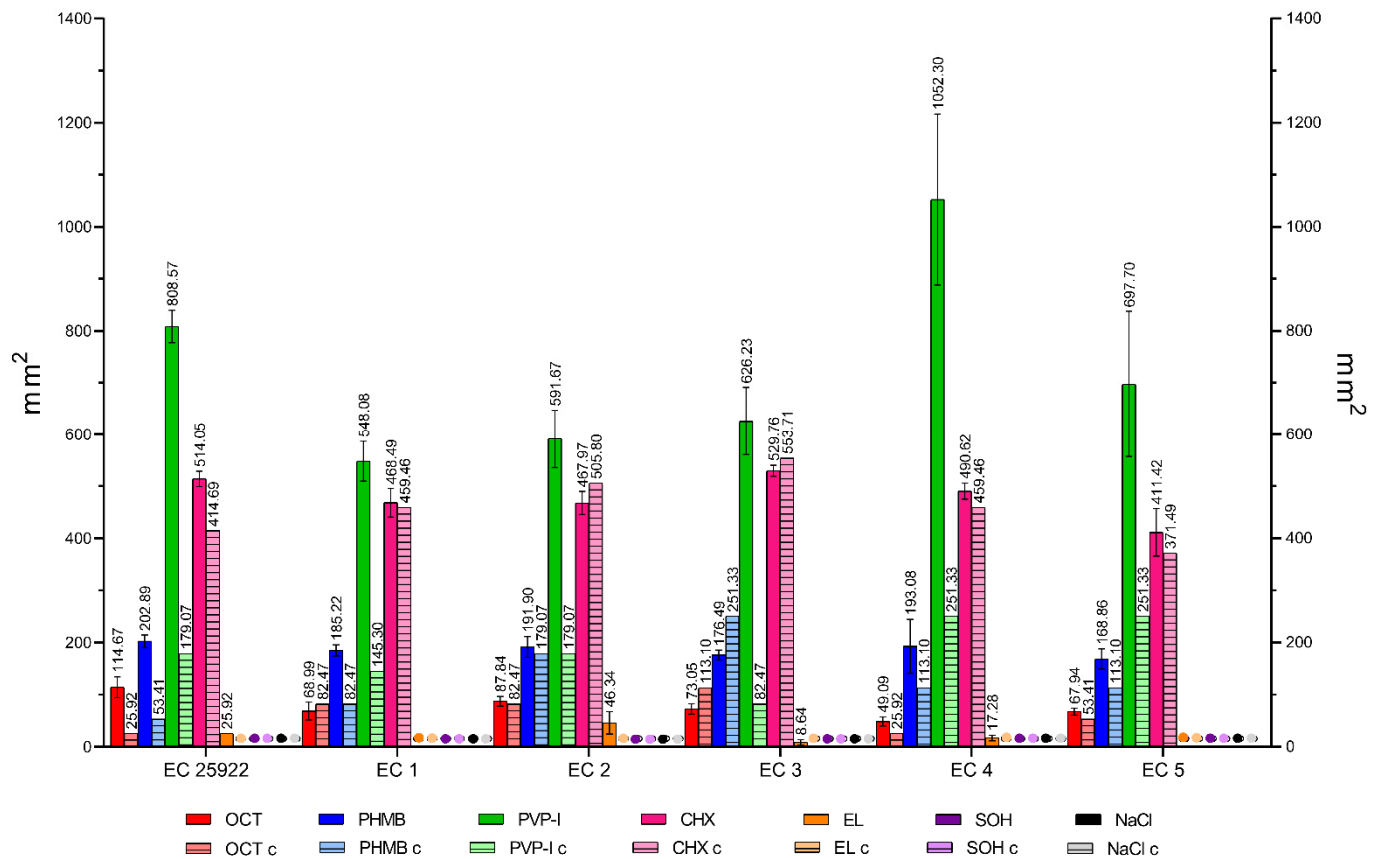

**Figure S5. Areas of growth inhibition zones for *Escherichia coli* strains.** Coloured bars indicate average growth inhibition zones areas caused by bacterial cellulose (BC) dressings chemisorbed with tested compounds (OCT – octenidine dihydrochloride, PHMB – polyhexanide, PVP-I – povidone iodine, CHX – chlorhexidine, EL – ethacridine lactate, SOH – super-oxidized hypochlorites solution, NaCl – sodium chloride as a negative control); striped bars indicate areas of growth inhibition zones caused by blotting paper soaked with tested compounds (OCT c – control of OCT activity, PHMB c – control of PHMB activity, PVP-I c – control of PVP-I activity, CHX c – control of CHX activity, EL c – control of EL activity, SOH c – control of SOH activity, NaCl c – control of NaCl activity). Dots point ineffective BC/blotting paper dressings. Growth inhibition zones areas exclude BC/blotting paper dressings surface areas.

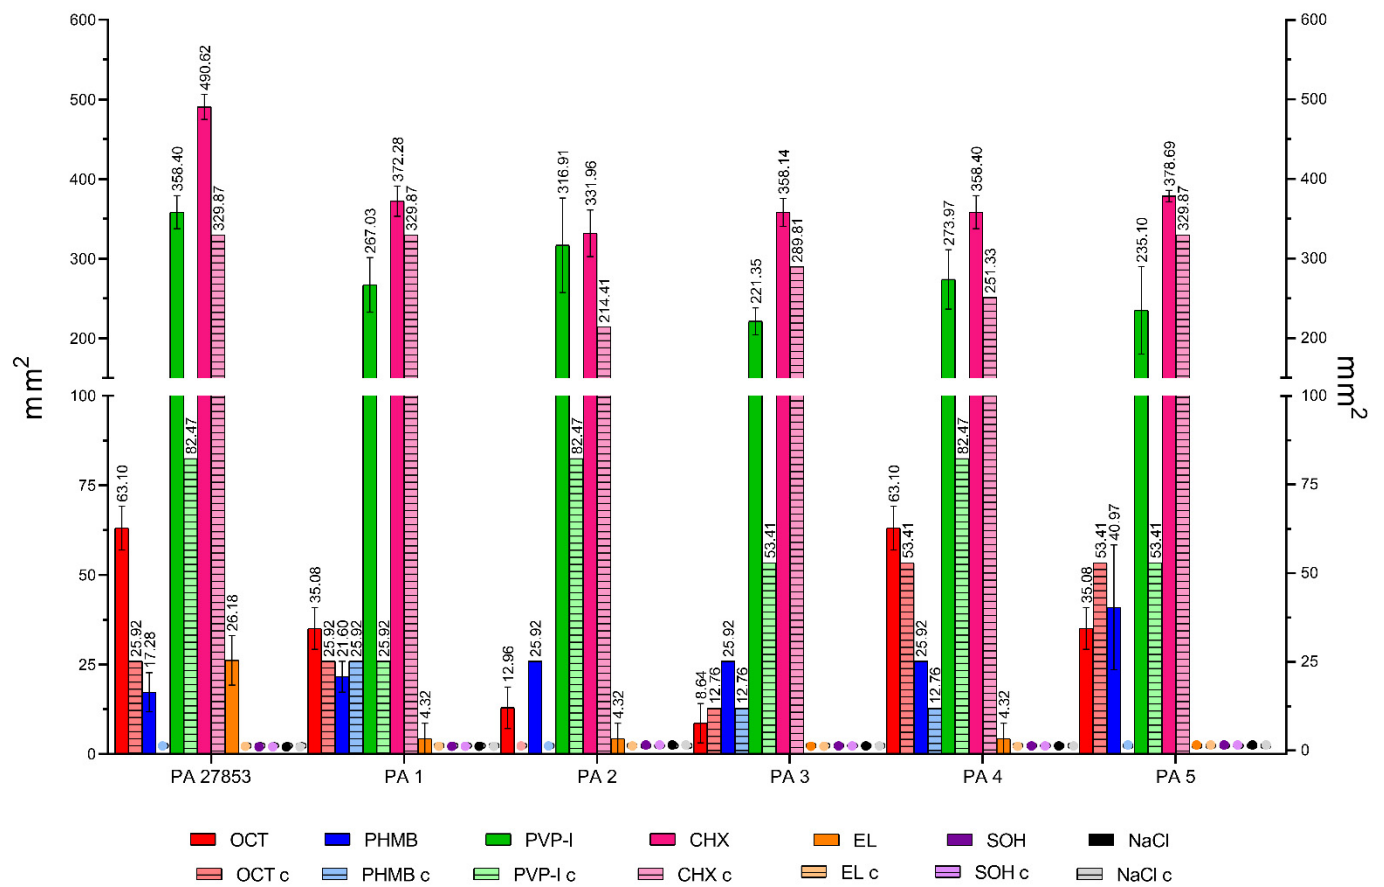

**Figure S6. Areas of growth inhibition zones for *Pseudomonas aeruginosa* strains.** Coloured bars indicate average growth inhibition zones areas caused by bacterial cellulose (BC) dressings chemisorbed with tested compounds (OCT – octenidine dihydrochloride, PHMB – polyhexanide, PVP-I – povidone iodine, CHX – chlorhexidine, EL – ethacridine lactate, SOH – super-oxidized hypochlorites solution, NaCl – sodium chloride as a negative control); striped bars indicate areas of growth inhibition zones caused by blotting paper soaked with tested compounds (OCT c – control of OCT activity, PHMB c – control of PHMB activity, PVP-I c – control of PVP-I activity, CHX c – control of CHX activity, EL c – control of EL activity, SOH c – control of SOH activity, NaCl c – control of NaCl activity). Dots point ineffective BC/blotting paper dressings. Growth inhibition zones areas exclude BC/blotting paper dressings surface areas.



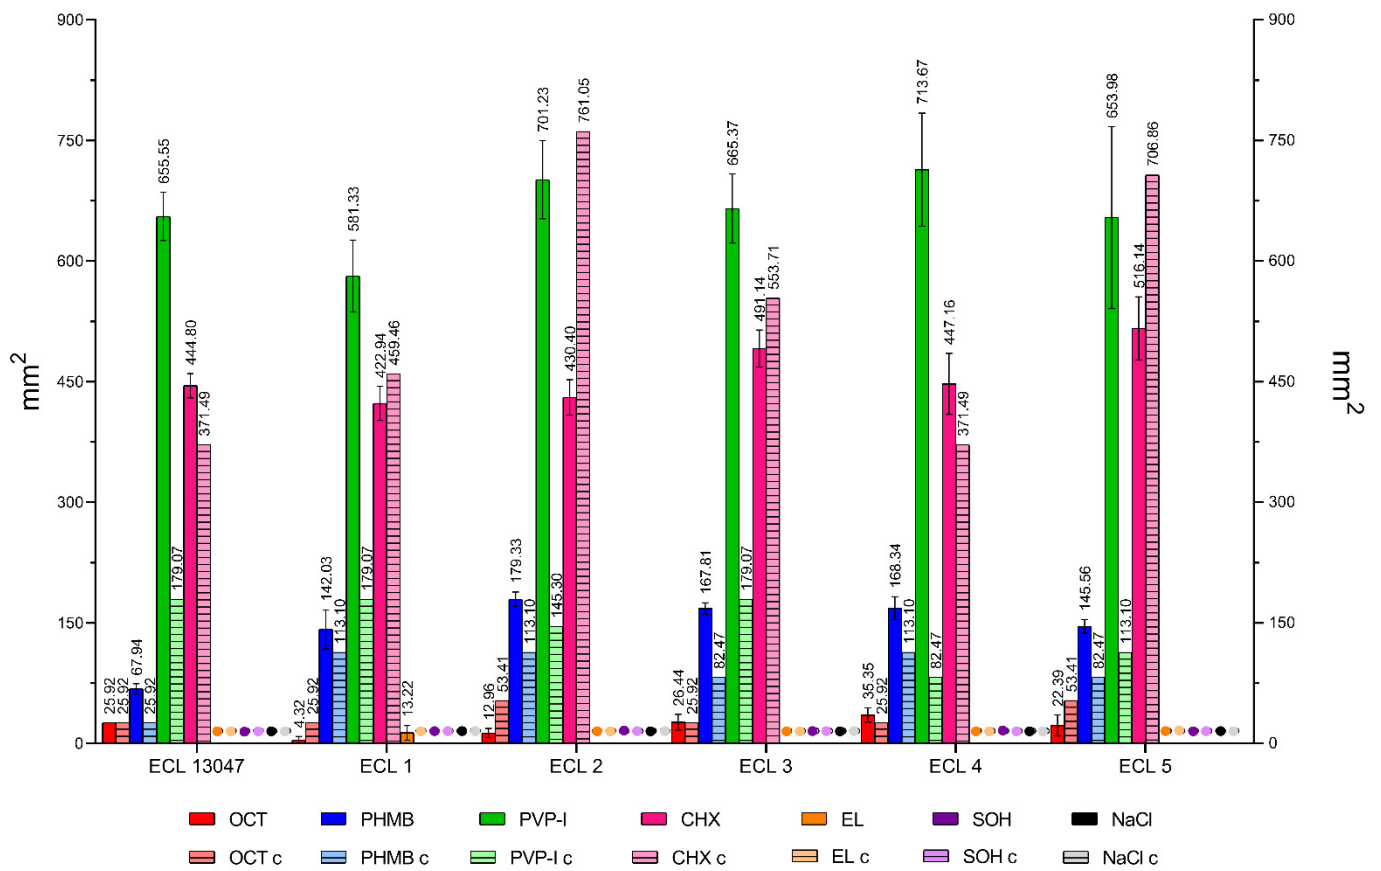

**Figure S7. Areas of growth inhibition zones for *Enterobacter cloacae* strains.** Coloured bars indicate average growth inhibition zones caused by bacterial cellulose (BC) dressings chemisorbed with tested compounds (OCT – octenidine dihydrochloride, PHMB – polyhexanide, PVP-I – povidone iodine, CHX – chlorhexidine, EL – ethacridine lactate, SOH – super-oxidized hypochlorites solution, NaCl – sodium chloride as a negative control); striped bars indicate areas of growth inhibition zones caused by blotting paper soaked with tested compounds (OCT c – control of OCT activity, PHMB c – control of PHMB activity, PVP-I c – control of PVP-I activity, CHX c – control of CHX activity, EL c – control of EL activity, SOH c – control of SOH activity, NaCl c – control of NaCl activity). Dots point ineffective BC/blotting paper dressings. Growth inhibition zones areas exclude BC/blotting paper dressings surface areas.

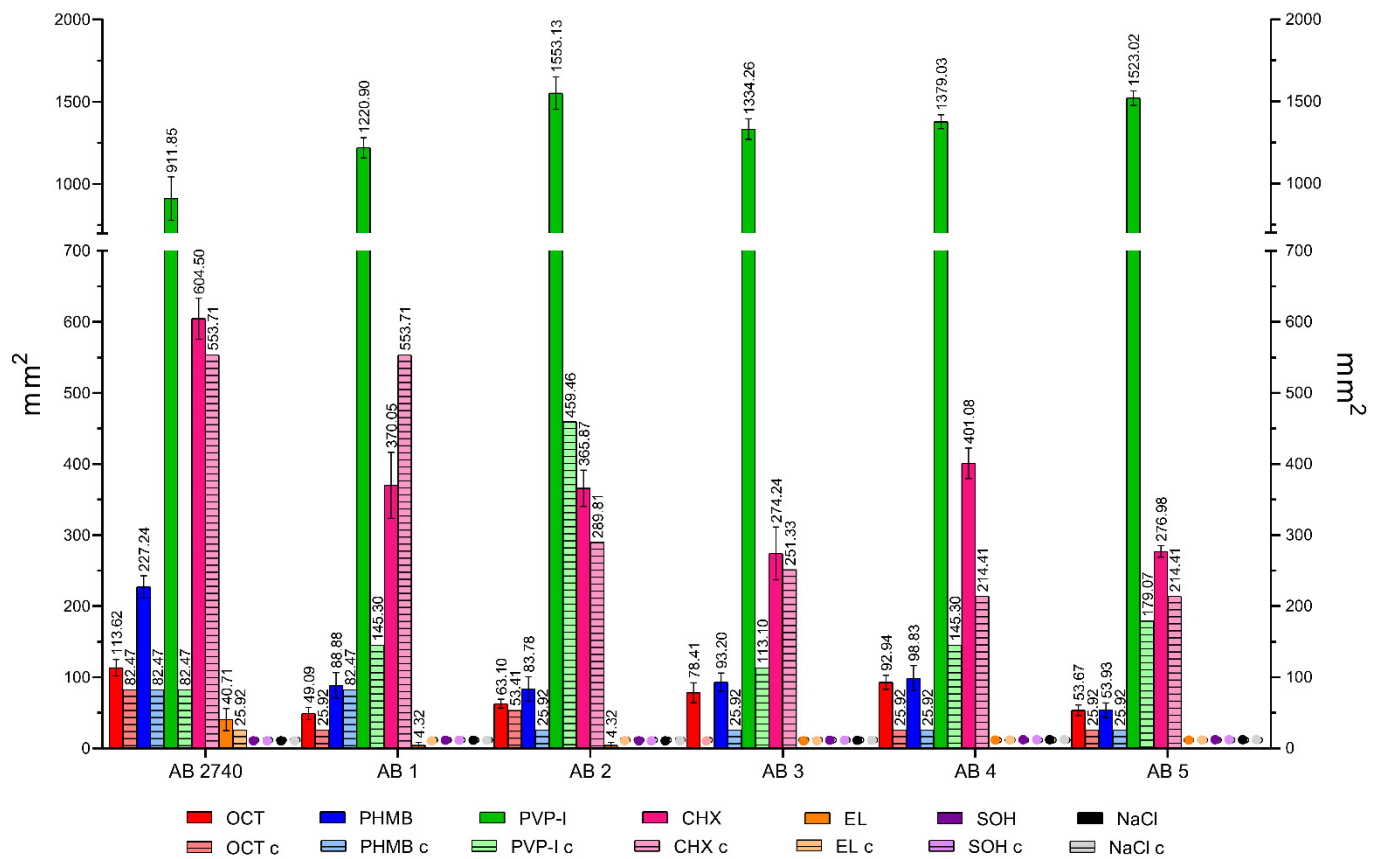

**Figure S8. Areas of growth inhibition zones for *Acinetobacter baumannii* strains.** Coloured bars indicate average growth inhibition zones areas caused by bacterial cellulose (BC) dressings chemisorbed with tested compounds (OCT – octenidine dihydrochloride, PHMB – polyhexanide, PVP-I – povidone iodine, CHX – chlorhexidine, EL – ethacridine lactate, SOH – super-oxidized hypochlorites solution, NaCl – sodium chloride as a negative control); striped bars indicate areas of growth inhibition zones caused by blotting paper soaked with tested compounds (OCT c – control of OCT activity, PHMB c – control of PHMB activity, PVP-I c – control of PVP-I activity, CHX c – control of CHX activity, EL c – control of EL activity, SOH c – control of SOH activity, NaCl c – control of NaCl activity). Dots point ineffective BC/blotting paper dressings. Growth inhibition zones areas exclude BC/blotting paper dressings surface areas.

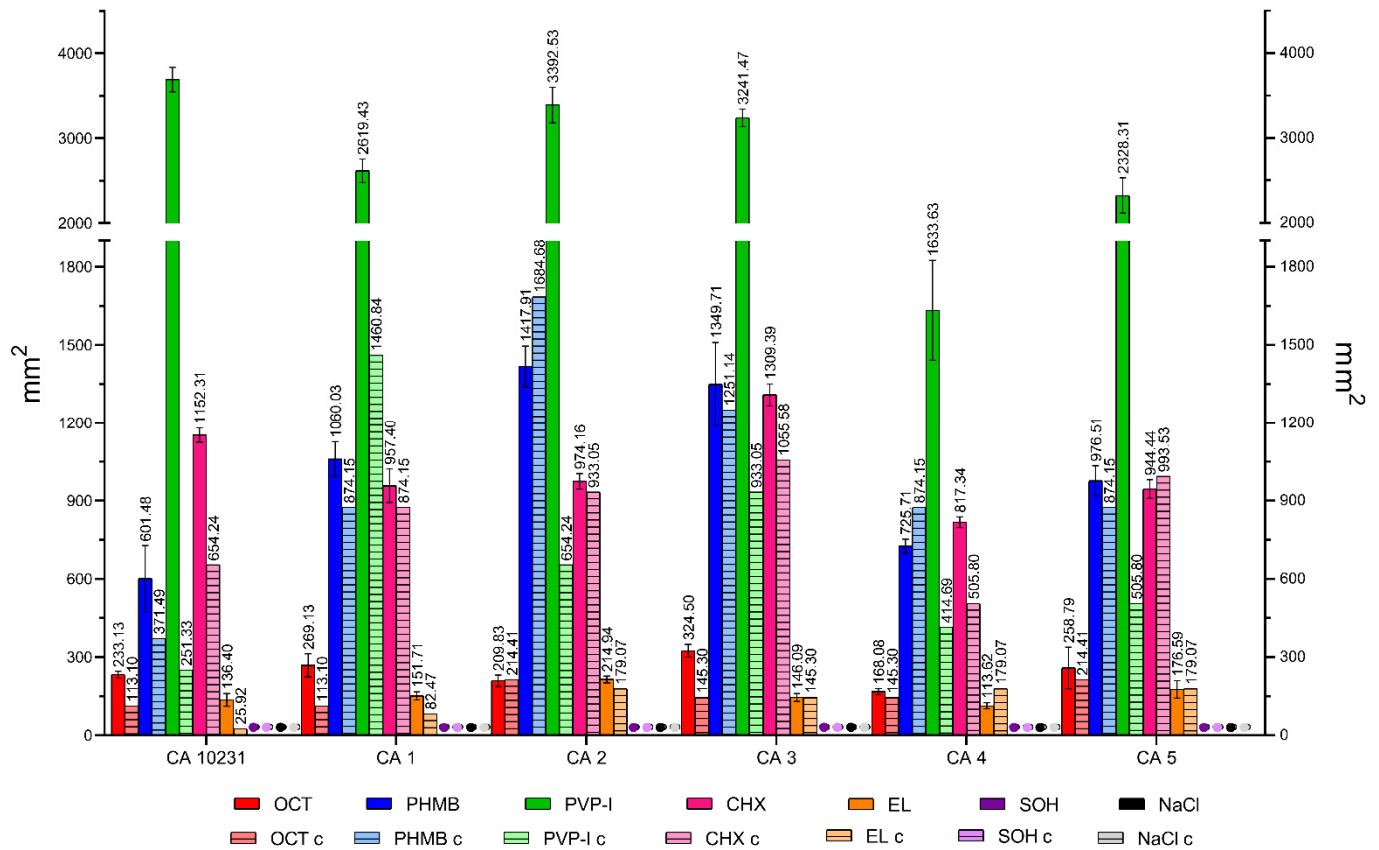

**Figure S9. Areas of growth inhibition zones for *Candida albicans* strains.** Coloured bars indicate average growth inhibition zones areas caused by bacterial cellulose (BC) dressings chemisorbed with tested compounds (OCT – octenidine dihydrochloride, PHMB – polyhexanide, PVP-I – povidone iodine, CHX – chlorhexidine, EL – ethacridine lactate, SOH – super-oxidized hypochlorites solution, NaCl – sodium chloride as a negative control); striped bars indicate areas of growth inhibition zones caused by blotting paper soaked with tested compounds (OCT c – control of OCT activity, PHMB c – control of PHMB activity, PVP-I c – control of PVP-I activity, CHX c – control of CHX activity, EL c – control of EL activity, SOH c – control of SOH activity, NaCl c – control of NaCl activity). Dots point ineffective BC/blotting paper dressings. Growth inhibition zones areas exclude BC/blotting paper dressings surface areas.



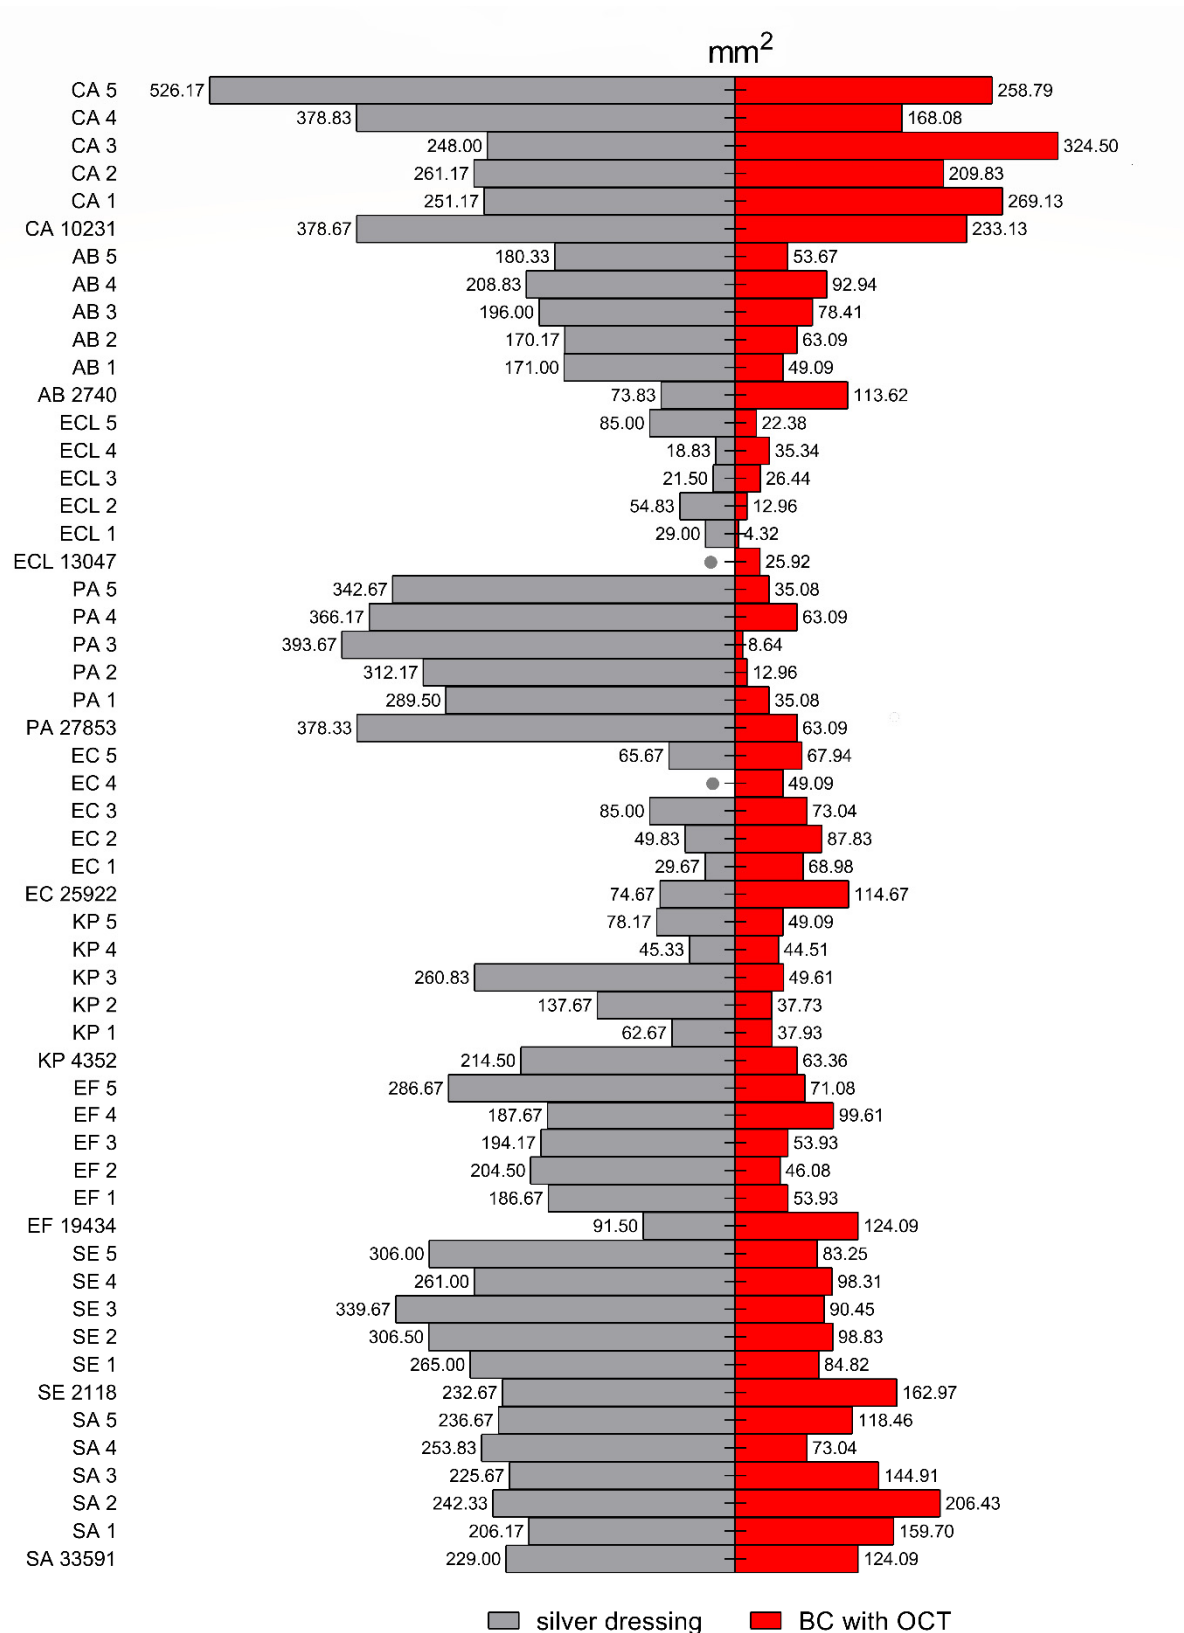

**Figure S10.** Graphic demonstration of average growth inhibition zones areas [mm<sup>2</sup>] caused by silver dressing comparison to BC dressing chemisorbed with octenidine (BC with OCT). Silver dressing – Aquacel® Ag (ConvaTec, Berkshire, England). Tested strains: SA – *Staphylococcus aureus*, SE – *Staphylococcus epidermidis*, EF – *Enterococcus faecium*, KP – *Klebsiella pneumoniae*, EC – *Escherichia coli*, PA – *Pseudomonas aeruginosa*, ECL – *Enterobacter cloacae*, AB – *Acinetobacter baumannii*, CA – *Candida albicans*. Dots point ineffective BC/silver dressings. Demonstrated growth inhibition zones areas [mm<sup>2</sup>] exclude BC/silver dressings surface areas.

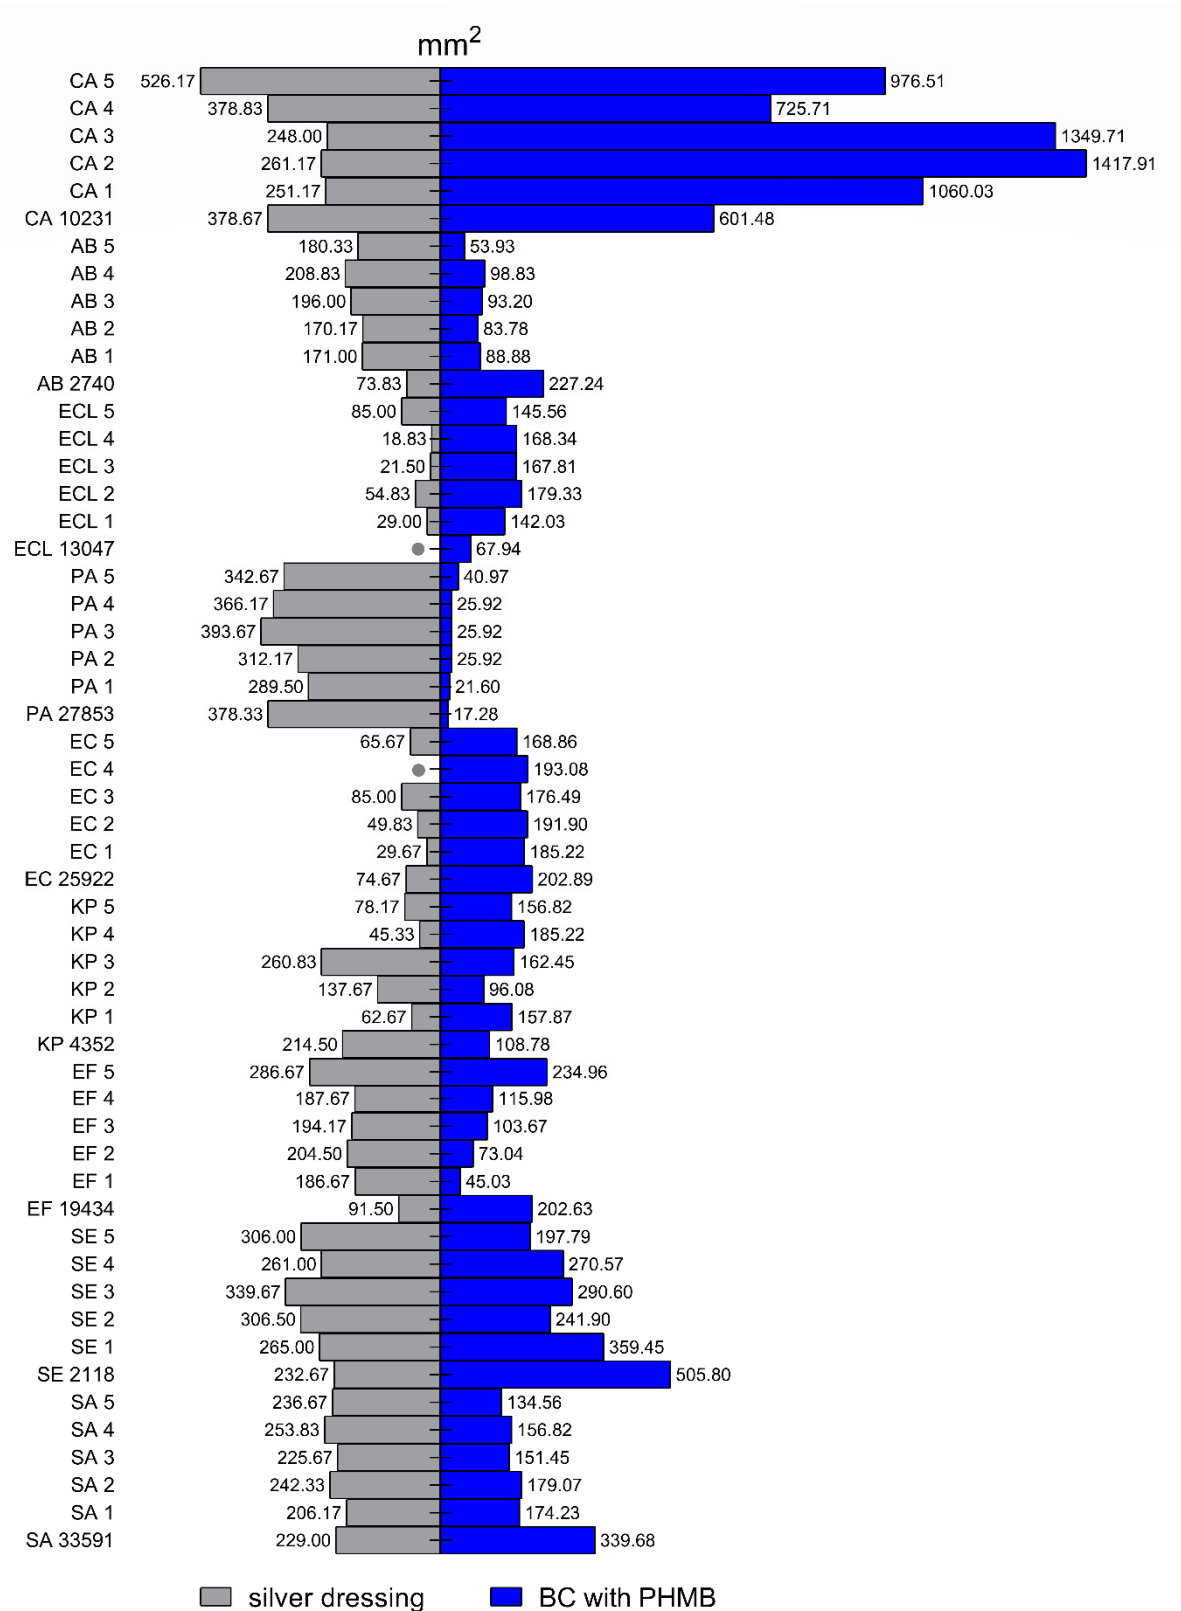

**Figure S11. Graphic demonstration of average growth inhibition zones areas caused by silver dressing comparison to BC dressing chemisorbed with polyhexanide (BC with PHMB).** Silver dressing – Aquacel® Ag (ConvaTec, Berkshire, England). Tested strains: SA – *Staphylococcus aureus*, SE – *Staphylococcus epidermidis*, EF – *Enterococcus faecium*, KP – *Klebsiella pneumoniae*, EC – *Escherichia coli*, PA – *Pseudomonas aeruginosa*, ECL – *Enterobacter cloacae*, AB – *Acinetobacter baumannii*, CA – *Candida albicans*. Dots point ineffective BC/silver dressings. Demonstrated growth inhibition zones areas [mm<sup>2</sup>] exclude BC/silver dressings surface areas.

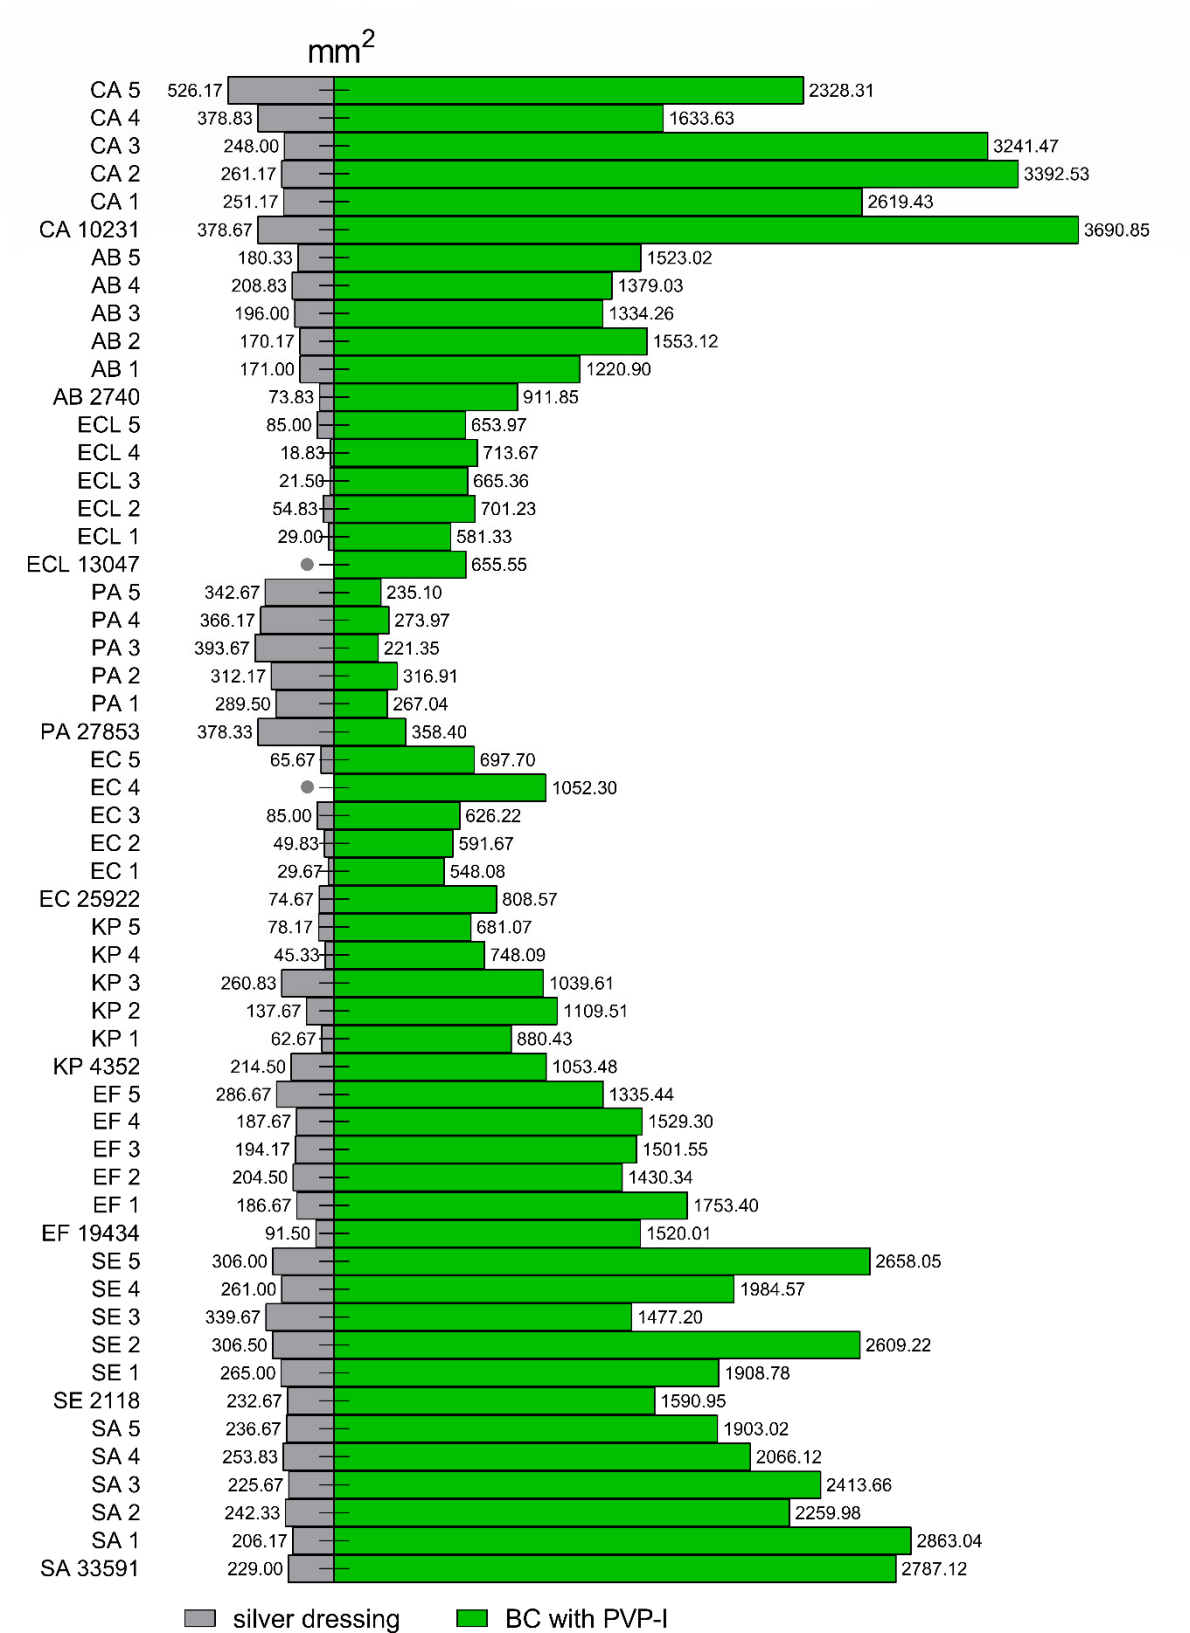

**Figure S12. Graphic demonstration of average growth inhibition zones areas caused by silver dressing comparison to BC dressing chemisorbed with povidone iodine (BC with PVP-I).** Silver dressing – Aquacel® Ag (ConvaTec, Berkshire, England). Tested strains: SA – *Staphylococcus aureus*, SE – *Staphylococcus epidermidis*, EF – *Enterococcus faecium*, KP – *Klebsiella pneumoniae*, EC – *Escherichia coli*, PA – *Pseudomonas aeruginosa*, ECL – *Enterobacter cloacae*, AB – *Acinetobacter baumannii*, CA – *Candida albicans*. Dots point ineffective BC/silver dressings. Demonstrated growth inhibition zones areas [mm<sup>2</sup>] exclude BC/silver dressings surface areas.



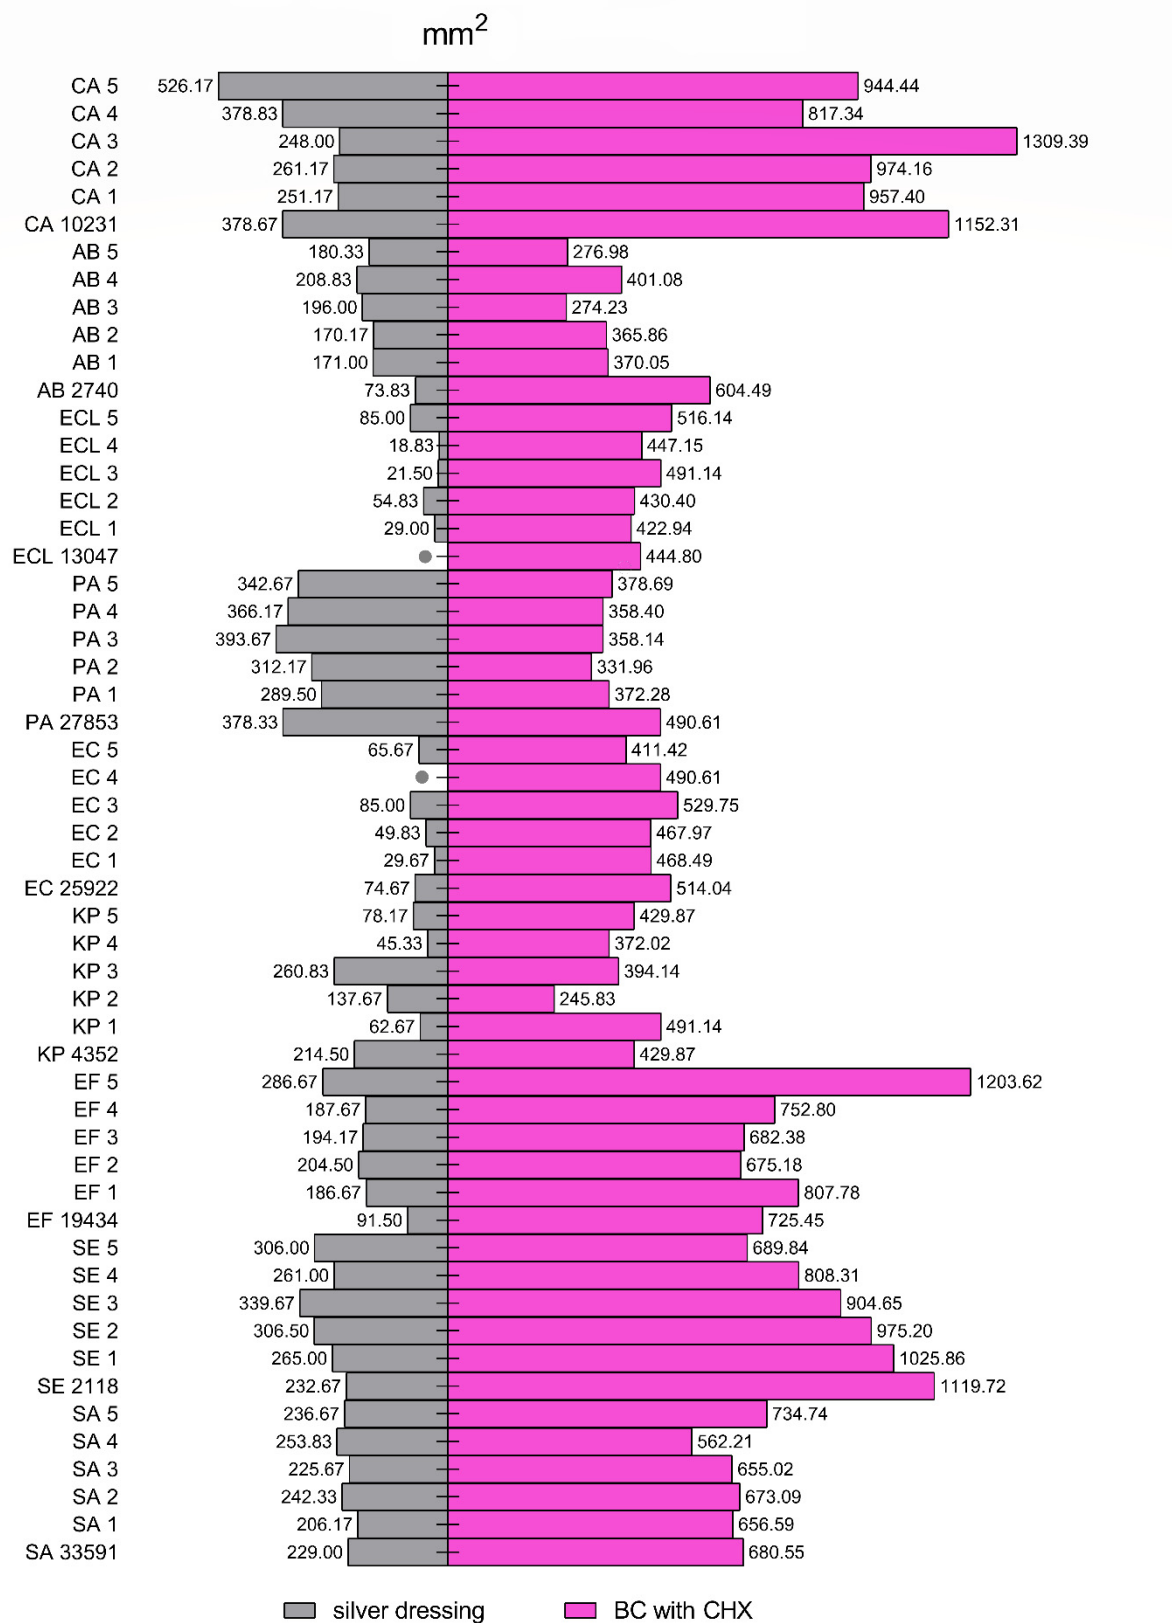

**Figure S13.** Graphic demonstration of average growth inhibition zones areas caused by silver dressing comparison to BC dressing chemisorbed with chlorhexidine (BC with CHX). Silver dressing – Aquacel® Ag (ConvaTec, Berkshire, England). Tested strains: SA – *Staphylococcus aureus*, SE – *Staphylococcus epidermidis*, EF – *Enterococcus faecium*, KP – *Klebsiella pneumoniae*, EC – *Escherichia coli*, PA – *Pseudomonas aeruginosa*, ECL – *Enterobacter cloacae*, AB – *Acinetobacter baumannii*, CA – *Candida albicans*. Dots point ineffective BC/silver dressings. Demonstrated growth inhibition zones areas [mm<sup>2</sup>] exclude BC/silver dressings surface areas.



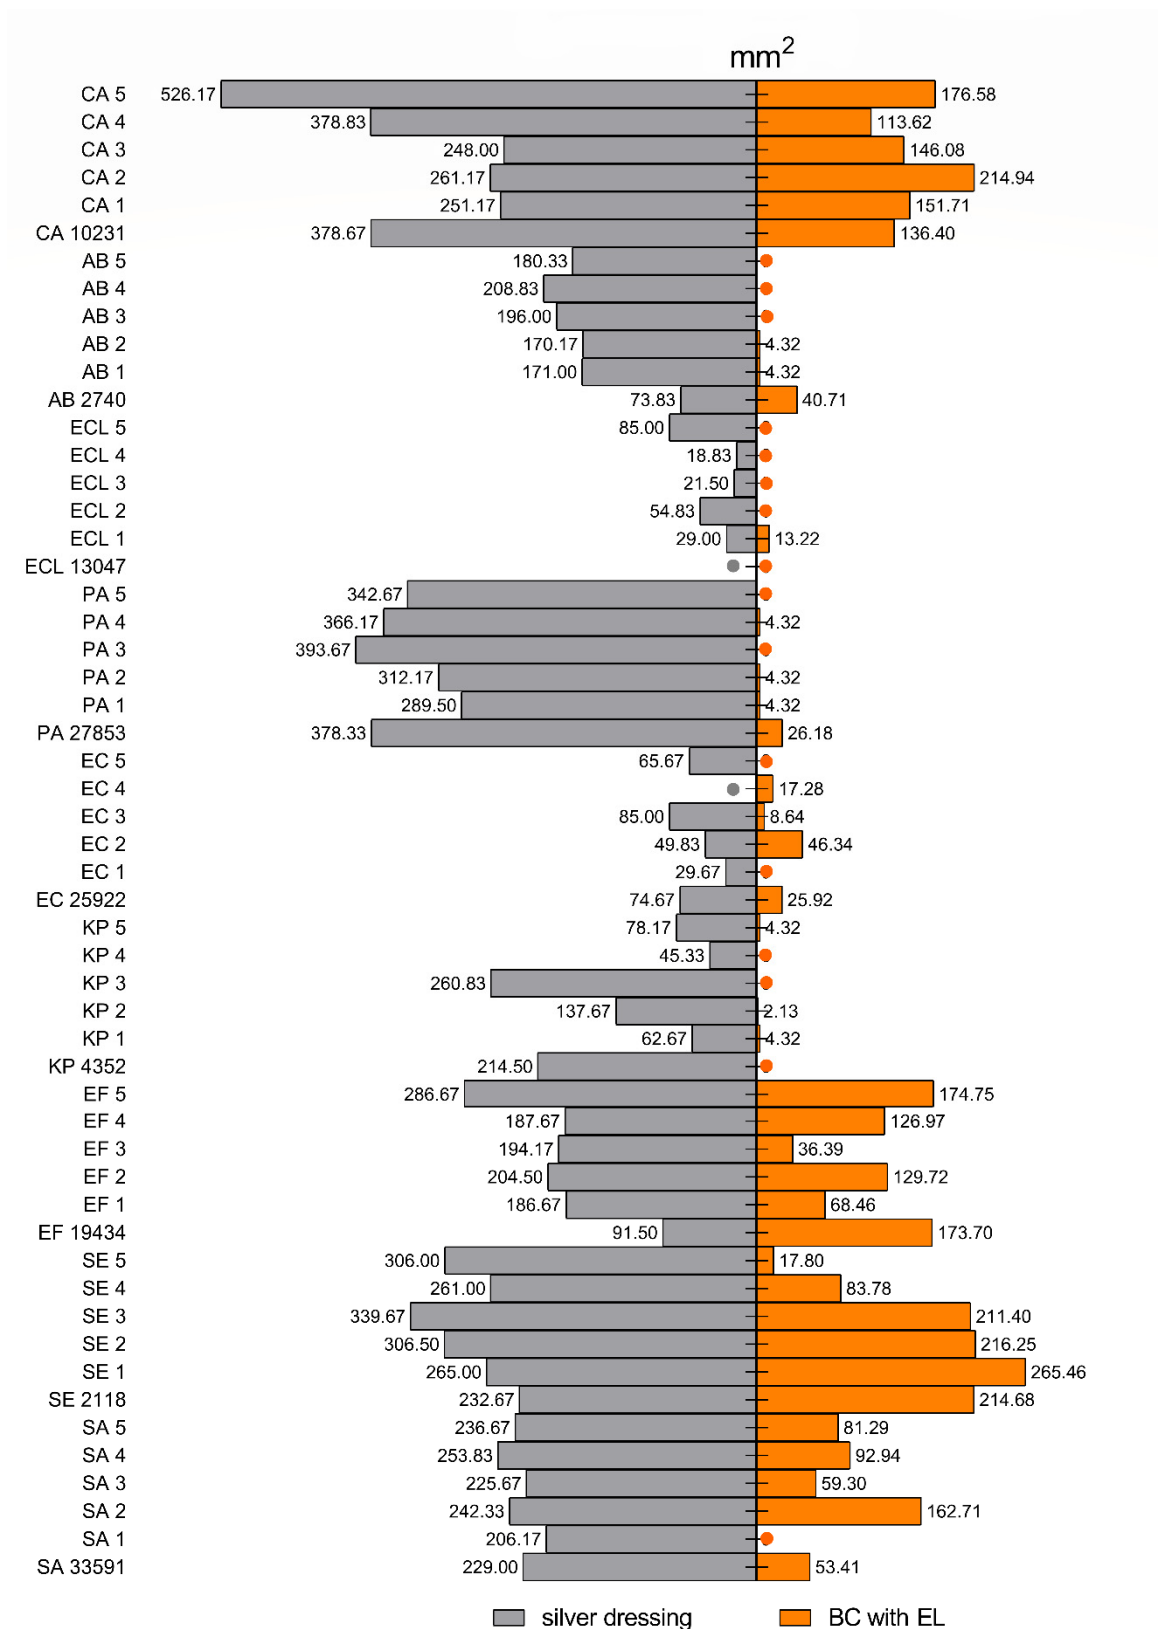

**Figure S14. Graphic demonstration of average growth inhibition zones areas caused by silver dressing comparison to BC dressing chemisorbed with ethacridine lactate (BC with EL).** Silver dressing – Aquacel® Ag (ConvaTec, Berkshire, England). Tested strains: SA – *Staphylococcus aureus*, SE – *Staphylococcus epidermidis*, EF – *Enterococcus faecium*, KP – *Klebsiella pneumoniae*, EC – *Escherichia coli*, PA – *Pseudomonas aeruginosa*, ECL – *Enterobacter cloacae*, AB – *Acinetobacter baumannii*, CA – *Candida albicans*. Dots point ineffective BC/silver dressings. Demonstrated growth inhibition zones areas [mm<sup>2</sup>] exclude BC/silver dressings surface areas.

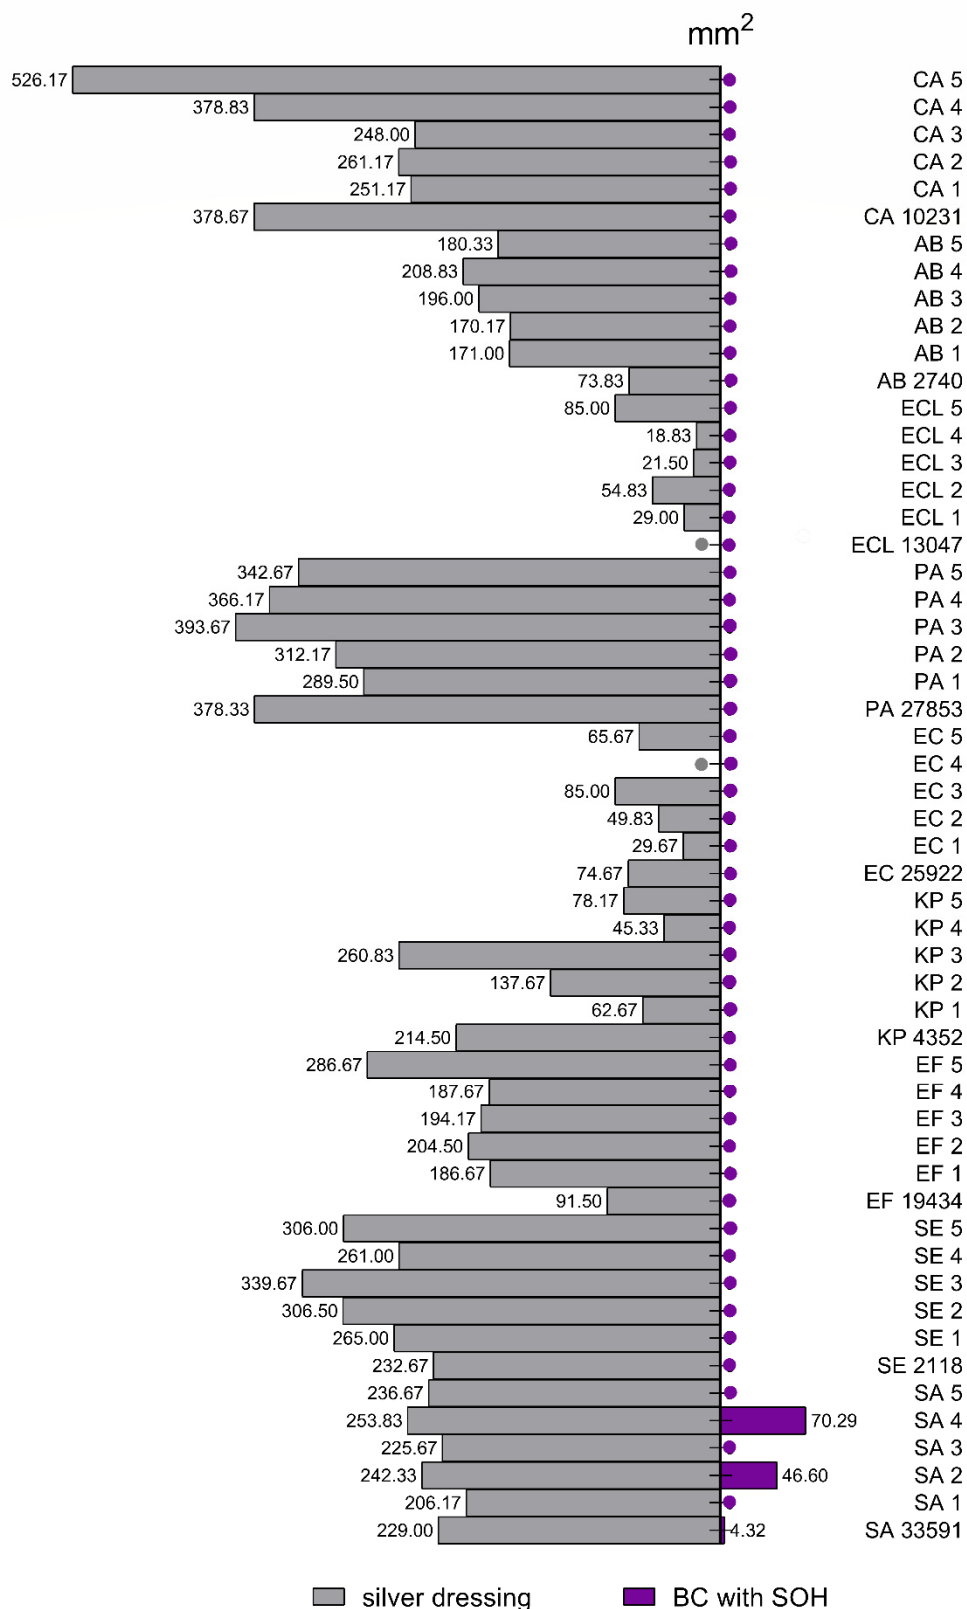

**Figure S15.** Graphic demonstration of average growth inhibition zones areas caused by silver dressing comparison to BC dressing chemisorbed with super-oxidized hypochlorous solution (BC with SOH). Silver dressing – Aquacel® Ag (ConvaTec, Berkshire, England). Tested strains: SA – *Staphylococcus aureus*, SE – *Staphylococcus epidermidis*, EF – *Enterococcus faecium*, KP – *Klebsiella pneumoniae*, EC – *Escherichia coli*, PA – *Pseudomonas aeruginosa*, ECL – *Enterobacter cloacae*, AB – *Acinetobacter baumannii*, CA – *Candida albicans*. Dots point ineffective BC/silver dressings. Demonstrated growth inhibition zones areas [mm<sup>2</sup>] exclude BC/silver dressings surface areas.

**Table S3. Average growth inhibition zones [mm<sup>2</sup>] obtained in modified disc-diffusion method with silver dressing use.** For every strain there were 6 repetitions. Values presented in the Table are reduced by areas of silver dressings. Silver dressing – Aquacel® Ag (ConvaTec, Berkshire, England). AA – arithmetic average, SD – standard deviation, SEM – standard error of mean, AAs – arithmetic average for whole species, SDs – standard deviation for whole species, SEMs – standard error of mean for whole species. Tested species: SA – *Staphylococcus aureus*, SE – *Staphylococcus epidermidis*, EF – *Enterococcus faecium*, KP – *Klebsiella pneumoniae*, EC – *Escherichia coli*, PA – *Pseudomonas aeruginosa*, ECL – *Enterobacter cloacae*, AB – *Acinetobacter baumannii*, CA – *Candida albicans*.

| strain    | growth inhibition zones [mm <sup>2</sup> ] |     |     |     |     |     | AA     | SD    | SEM   | AAs    | SDs    | SEMs  |
|-----------|--------------------------------------------|-----|-----|-----|-----|-----|--------|-------|-------|--------|--------|-------|
| SA 33591  | 274                                        | 224 | 245 | 245 | 203 | 183 | 229,00 | 32,72 | 13,36 | 232,28 | 33,68  | 5,61  |
| SA 1      | 165                                        | 238 | 245 | 189 | 190 | 210 | 206,17 | 30,94 | 12,63 |        |        |       |
| SA 2      | 230                                        | 250 | 287 | 217 | 204 | 266 | 242,33 | 31,23 | 12,75 |        |        |       |
| SA 3      | 244                                        | 266 | 230 | 179 | 190 | 245 | 225,67 | 34,07 | 13,91 |        |        |       |
| SA 4      | 304                                        | 287 | 273 | 259 | 190 | 210 | 253,83 | 44,74 | 18,26 |        |        |       |
| SA 5      | 259                                        | 245 | 224 | 230 | 224 | 238 | 236,67 | 13,68 | 5,58  |        |        |       |
| SE 2118   | 231                                        | 252 | 210 | 204 | 224 | 275 | 232,67 | 26,76 | 10,92 | 285,14 | 57,05  | 9,51  |
| SE 1      | 170                                        | 320 | 351 | 259 | 259 | 231 | 265,00 | 64,30 | 26,25 |        |        |       |
| SE 2      | 280                                        | 383 | 324 | 301 | 333 | 218 | 306,50 | 55,54 | 22,68 |        |        |       |
| SE 3      | 380                                        | 280 | 302 | 347 | 311 | 418 | 339,67 | 52,19 | 21,31 |        |        |       |
| SE 4      | 304                                        | 259 | 245 | 238 | 245 | 275 | 261,00 | 24,86 | 10,15 |        |        |       |
| SE 5      | 311                                        | 342 | 334 | 274 | 224 | 351 | 306,00 | 48,74 | 19,90 |        |        |       |
| EF 19434  | 76                                         | 87  | 90  | 93  | 107 | 96  | 91,50  | 10,25 | 4,19  | 191,86 | 60,85  | 10,14 |
| EF 1      | 204                                        | 198 | 165 | 165 | 198 | 190 | 186,67 | 17,36 | 7,09  |        |        |       |
| EF 2      | 198                                        | 184 | 198 | 217 | 178 | 252 | 204,50 | 26,91 | 10,98 |        |        |       |
| EF 3      | 204                                        | 168 | 174 | 230 | 211 | 178 | 194,17 | 24,56 | 10,03 |        |        |       |
| EF 4      | 192                                        | 198 | 167 | 179 | 198 | 192 | 187,67 | 12,27 | 5,01  |        |        |       |
| EF 5      | 259                                        | 258 | 324 | 320 | 293 | 266 | 286,67 | 30,20 | 12,33 |        |        |       |
| KP 4352   | 198                                        | 198 | 204 | 252 | 211 | 224 | 214,50 | 20,80 | 8,49  | 133,19 | 83,76  | 13,96 |
| KP 1      | 88                                         | 60  | 41  | 56  | 60  | 71  | 62,67  | 15,74 | 6,43  |        |        |       |
| KP 2      | 155                                        | 128 | 124 | 128 | 150 | 141 | 137,67 | 12,94 | 5,28  |        |        |       |
| KP 3      | 204                                        | 273 | 272 | 238 | 266 | 312 | 260,83 | 36,52 | 14,91 |        |        |       |
| KP 4      | 14                                         | 72  | 46  | 44  | 64  | 32  | 45,33  | 21,08 | 8,60  |        |        |       |
| KP 5      | 76                                         | 76  | 71  | 74  | 73  | 99  | 78,17  | 10,38 | 4,24  |        |        |       |
| EC 25922  | 58                                         | 29  | 29  | 114 | 90  | 128 | 74,67  | 42,60 | 17,39 | 50,81  | 39,70  | 6,62  |
| EC 1      | 30                                         | 0   | 28  | 29  | 46  | 45  | 29,67  | 16,65 | 6,80  |        |        |       |
| EC 2      | 76                                         | 59  | 76  | 44  | 0   | 44  | 49,83  | 28,30 | 11,55 |        |        |       |
| EC 3      | 160                                        | 76  | 58  | 57  | 43  | 116 | 85,00  | 44,60 | 18,21 |        |        |       |
| EC 4      | 0                                          | 0   | 0   | 0   | 0   | 0   | 0,00   | 0,00  | 0,00  |        |        |       |
| EC 5      | 58                                         | 58  | 58  | 70  | 60  | 90  | 65,67  | 12,80 | 5,23  |        |        |       |
| PA 27853  | 304                                        | 370 | 418 | 436 | 418 | 324 | 378,33 | 54,81 | 22,38 | 347,08 | 61,38  | 10,23 |
| PA 1      | 238                                        | 324 | 324 | 259 | 342 | 250 | 289,50 | 45,34 | 18,51 |        |        |       |
| PA 2      | 333                                        | 333 | 297 | 324 | 294 | 292 | 312,17 | 19,87 | 8,11  |        |        |       |
| PA 3      | 272                                        | 456 | 442 | 404 | 418 | 370 | 393,67 | 66,76 | 27,25 |        |        |       |
| PA 4      | 370                                        | 370 | 365 | 380 | 370 | 342 | 366,17 | 12,81 | 5,23  |        |        |       |
| PA 5      | 394                                        | 434 | 326 | 259 | 238 | 405 | 342,67 | 81,36 | 33,21 |        |        |       |
| ECL 13047 | 0                                          | 0   | 0   | 0   | 0   | 0   | 0,00   | 0,00  | 0,00  | 34,86  | 38,84  | 6,47  |
| ECL 1     | 58                                         | 58  | 0   | 0   | 0   | 58  | 29,00  | 31,77 | 12,97 |        |        |       |
| ECL 2     | 124                                        | 58  | 60  | 0   | 43  | 44  | 54,83  | 40,21 | 16,42 |        |        |       |
| ECL 3     | 0                                          | 73  | 0   | 0   | 56  | 0   | 21,50  | 33,74 | 13,77 |        |        |       |
| ECL 4     | 0                                          | 0   | 0   | 0   | 42  | 71  | 18,83  | 30,58 | 12,49 |        |        |       |
| ECL 5     | 48                                         | 87  | 93  | 99  | 93  | 90  | 85,00  | 18,56 | 7,58  |        |        |       |
| AB 2740   | 90                                         | 65  | 78  | 93  | 58  | 59  | 73,83  | 15,46 | 6,31  | 166,69 | 60,41  | 10,07 |
| AB 1      | 184                                        | 223 | 204 | 160 | 142 | 113 | 171,00 | 40,71 | 16,62 |        |        |       |
| AB 2      | 198                                        | 165 | 196 | 165 | 132 | 165 | 170,17 | 24,41 | 9,96  |        |        |       |
| AB 3      | 198                                        | 198 | 259 | 152 | 204 | 165 | 196,00 | 37,25 | 15,21 |        |        |       |
| AB 4      | 210                                        | 145 | 370 | 170 | 128 | 230 | 208,83 | 87,80 | 35,84 |        |        |       |
| AB 5      | 160                                        | 174 | 189 | 198 | 173 | 188 | 180,33 | 13,81 | 5,64  |        |        |       |
| CA 10231  | 393                                        | 337 | 418 | 337 | 333 | 454 | 378,67 | 50,96 | 20,80 | 340,67 | 105,29 | 17,55 |
| CA 1      | 245                                        | 245 | 280 | 204 | 245 | 288 | 251,17 | 30,09 | 12,28 |        |        |       |
| CA 2      | 259                                        | 259 | 259 | 259 | 258 | 273 | 261,17 | 5,81  | 2,37  |        |        |       |
| CA 3      | 204                                        | 274 | 245 | 224 | 267 | 274 | 248,00 | 29,10 | 11,88 |        |        |       |
| CA 4      | 380                                        | 334 | 404 | 405 | 370 | 380 | 378,83 | 26,11 | 10,66 |        |        |       |
| CA 5      | 519                                        | 520 | 546 | 506 | 520 | 546 | 526,17 | 16,25 | 6,64  |        |        |       |

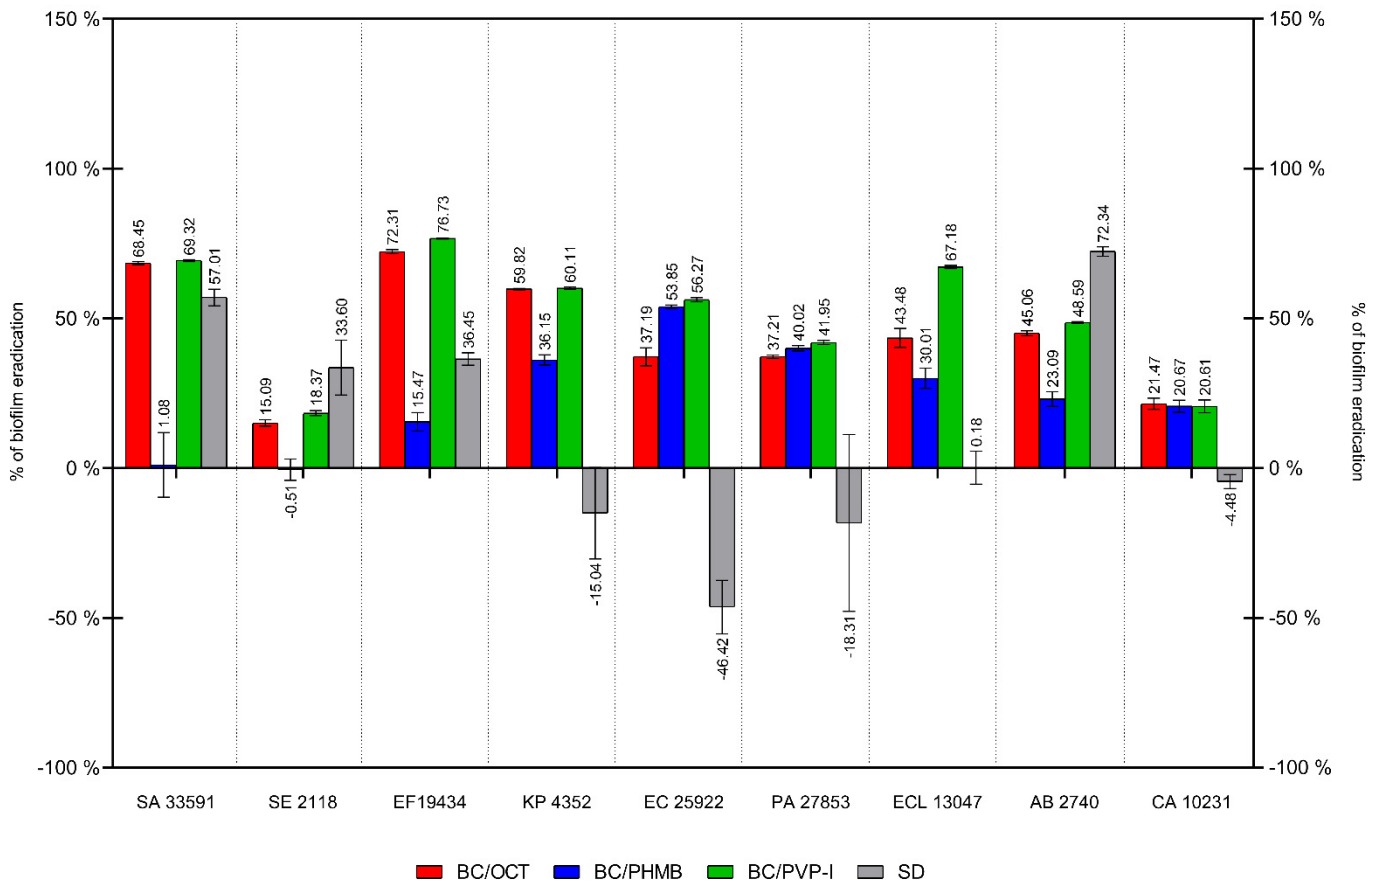

**Figure S16.** The results of A.D.A.M. test presented as an average percent of metabolically active cells in biofilm eradication in tryptic-soy broth (TSB) culture medium. Tested dressings: BC/OCT – bacterial cellulose with octenidine dihydrochloride, BC/PHMB – bacterial cellulose with polyhexanide, BC/PVP-I – bacterial cellulose with povidone iodine, SD – silver dressing (Aquacel® Ag, ConvaTec, Berkshire, England). Tested strains: SA 33591 – *Staphylococcus aureus* ATCC 33591, SE 2118 – *Staphylococcus epidermidis* PCM 2118, EF 19434 – *Enterococcus faecium* ATCC 19434, KP 4352 – *Klebsiella pneumoniae* ATCC 4352, EC 25922 – *Escherichia coli* ATCC 25922, PA 27853 – *Pseudomonas aeruginosa* ATCC 27853, ECL 13047 – *Enterobacter cloacae* ATCC 13047, AB 2740 – *Acinetobacter baumannii* PCM 2740, CA 10231 – *Candida albicans* ATCC 10231.

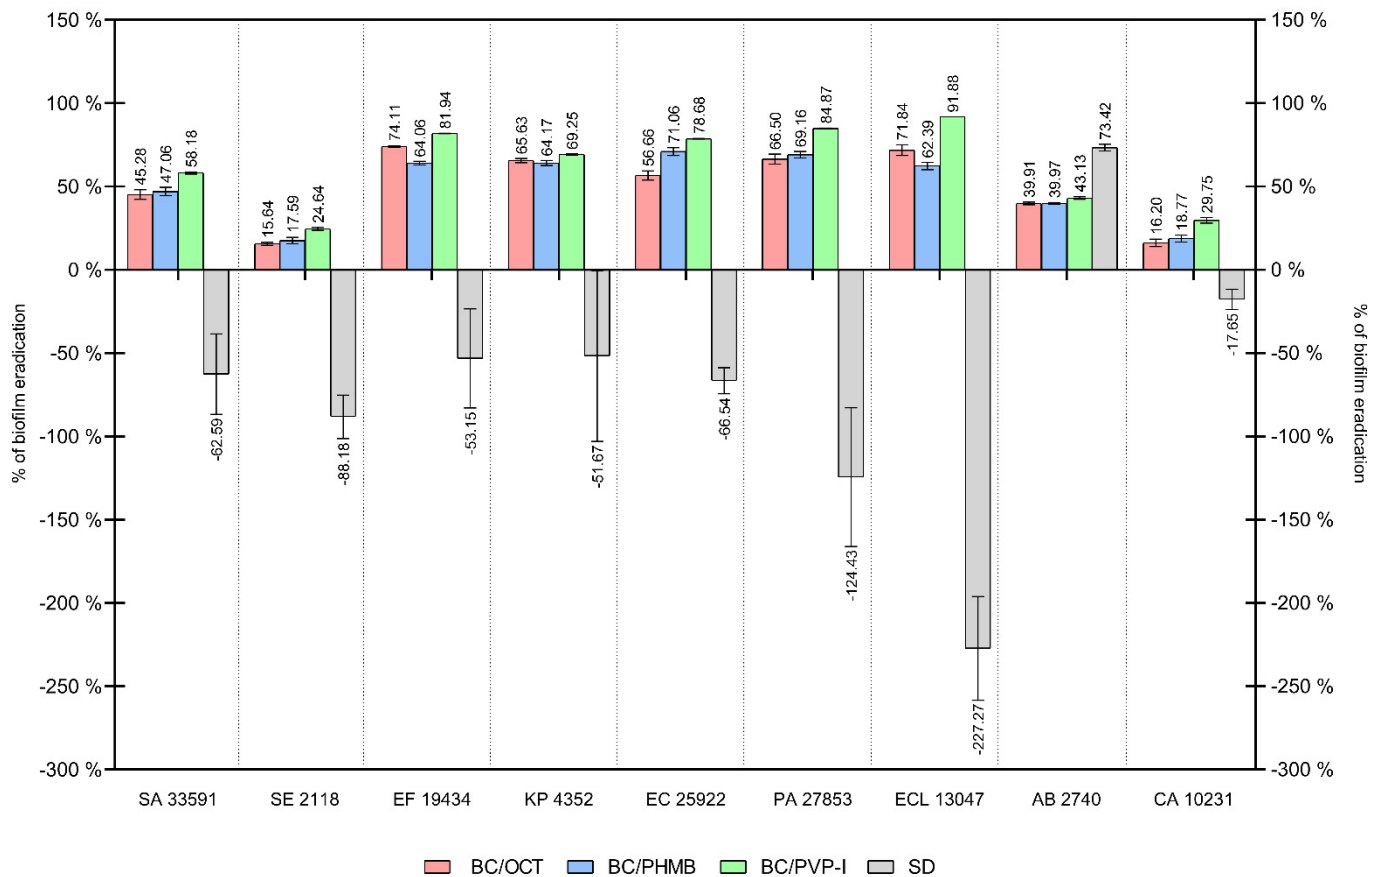

**Figure S17.** The results of A.D.A.M. test presented as an average percent of metabolically active cells in biofilm eradication in artificial exudate (AE) culture medium. Tested dressings: BC/OCT – bacterial cellulose with octenidine dihydrochloride, BC/PHMB – bacterial cellulose with polyhexanide, BC/PVP-I – bacterial cellulose with povidone iodine, SD – silver dressing (Aquacel® Ag, ConvaTec, Berkshire, England). Tested strains: SA 33591 – *Staphylococcus aureus* ATCC 33591, SE 2118 – *Staphylococcus epidermidis* PCM 2118, EF 19434 – *Enterococcus faecium* ATCC 19434, KP 4352 – *Klebsiella pneumoniae* ATCC 4352, EC 25922 – *Escherichia coli* ATCC 25922, PA 27853 – *Pseudomonas aeruginosa* ATCC 27853, ECL 13047 – *Enterobacter cloacae* ATCC 13047, AB 2740 – *Acinetobacter baumannii* PCM 2740, CA 10231 – *Candida albicans* ATCC 10231.



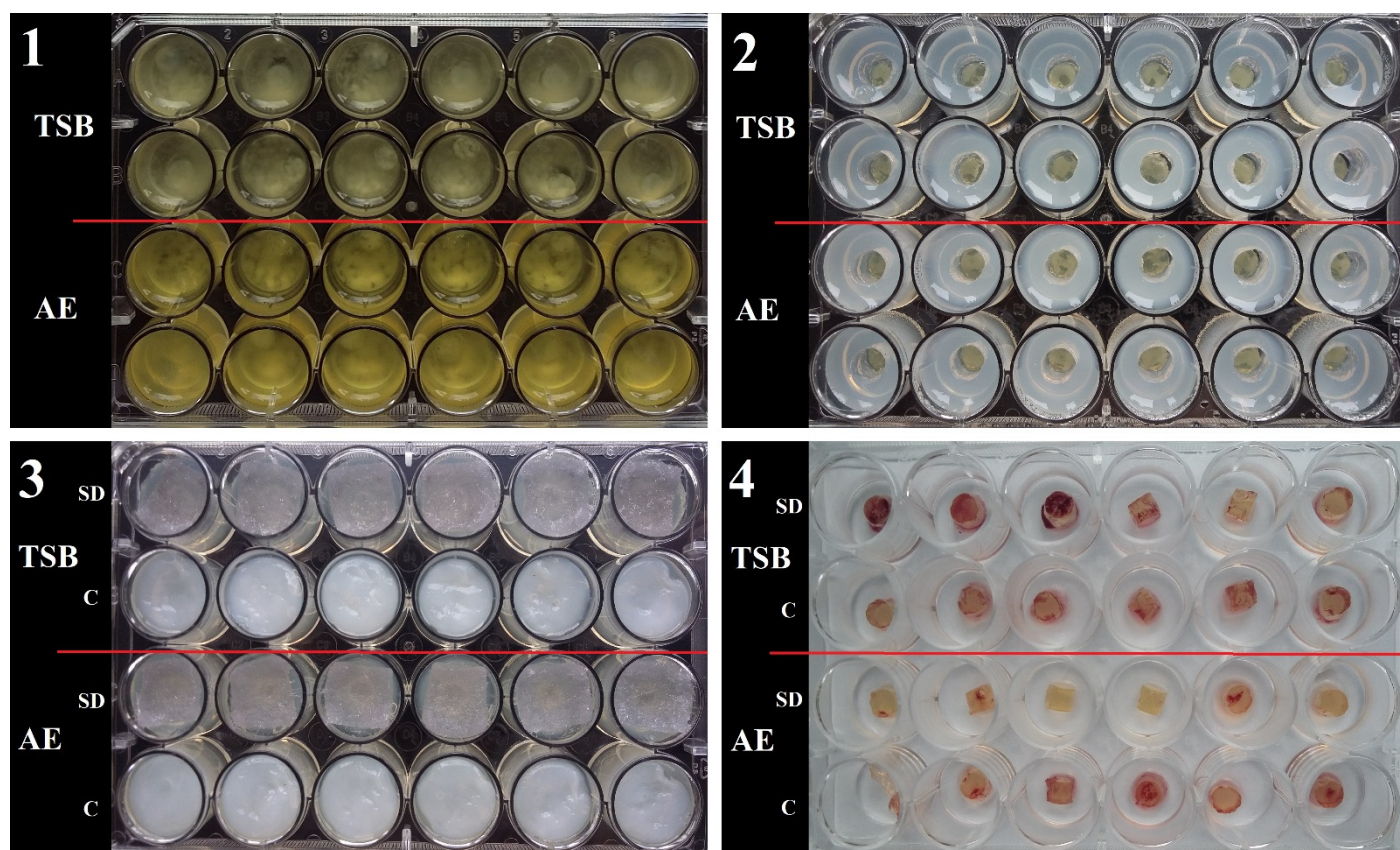

**Figure S18. Stages of the modified A.D.A.M. test.** 1 – *Staphylococcus aureus* ATCC 33591 biofilm culture on agar discs; 2 – placing agar discs with biofilm into agar tubes and filling the tubes with culture media; 3 – covering the tubes with tested dressings; 4 – staining of biofilm with the 2, 3, 5- triphenyl tetrazolium chloride after 24h incubation with tested dressings. TSB – tryptic soy broth culture medium; AE – artificial exudate; SD - Aquacel® Ag silver dressing (ConvaTec, Berkshire, England); C – negative control: bacterial cellulose chemisorbed with sterile saline.
